# Supplementary material for: In silico identification of two peptides with antibacterial activity against multidrug-resistant Staphylococcus aureus
Source: Springer Nature journal article supplement (doi:10.1038/s41522-022-00320-0), 2022-07-14
Supplement: MOESM1 [file 41522_2022_320_MOESM1_ESM.pdf]

# Supplementary Information for

## ***In silico* identification of two novel peptides with antibacterial activity against multidrug resistant *Staphylococcus aureus***

Linda B Oyama, Hamza Olleik, Ana Carolina Nery Teixeira, Matheus M Guidini, James A Pickup, Brandon Yeo Pei Hui, Nicolas Vidal, Alan R Cookson, Hannah Vallin, Toby Wilkinson, Denise M S Bazzolli, Jennifer Richards, Mandy Wootton, Ralf Mikut, Kai Hilpert, Marc Maresca, Josette Perrier, Matthias Hess, Hilario C Mantovani, Narcis Fernandez-Fuentes, Christopher J Creevey, and Sharon A Huws.

---

Corresponding authors: Dr Linda B Oyama ([l.oyama@qub.ac.uk](mailto:l.oyama@qub.ac.uk)) and Dr Sharon A Huws ([s.huws@qub.ac.uk](mailto:s.huws@qub.ac.uk))

### **This PDF file includes:**

Supplementary Figures 1 to 3  
Supplementary Tables 1 to 11

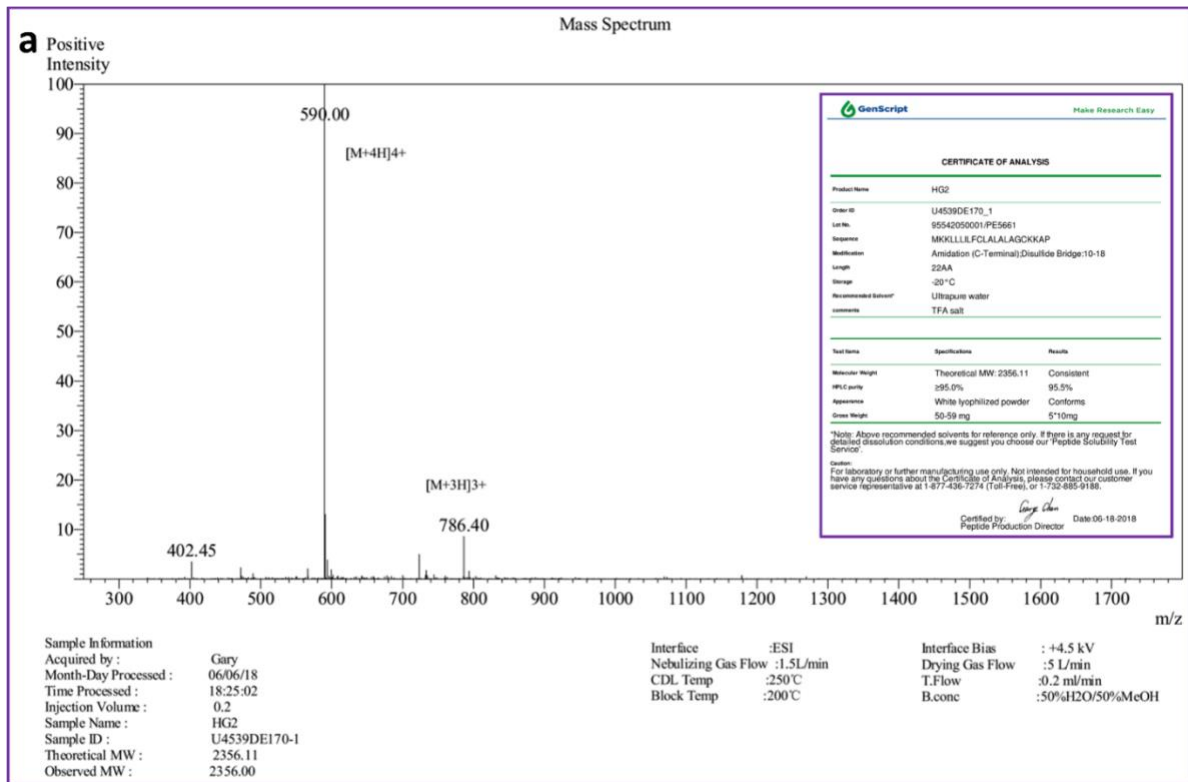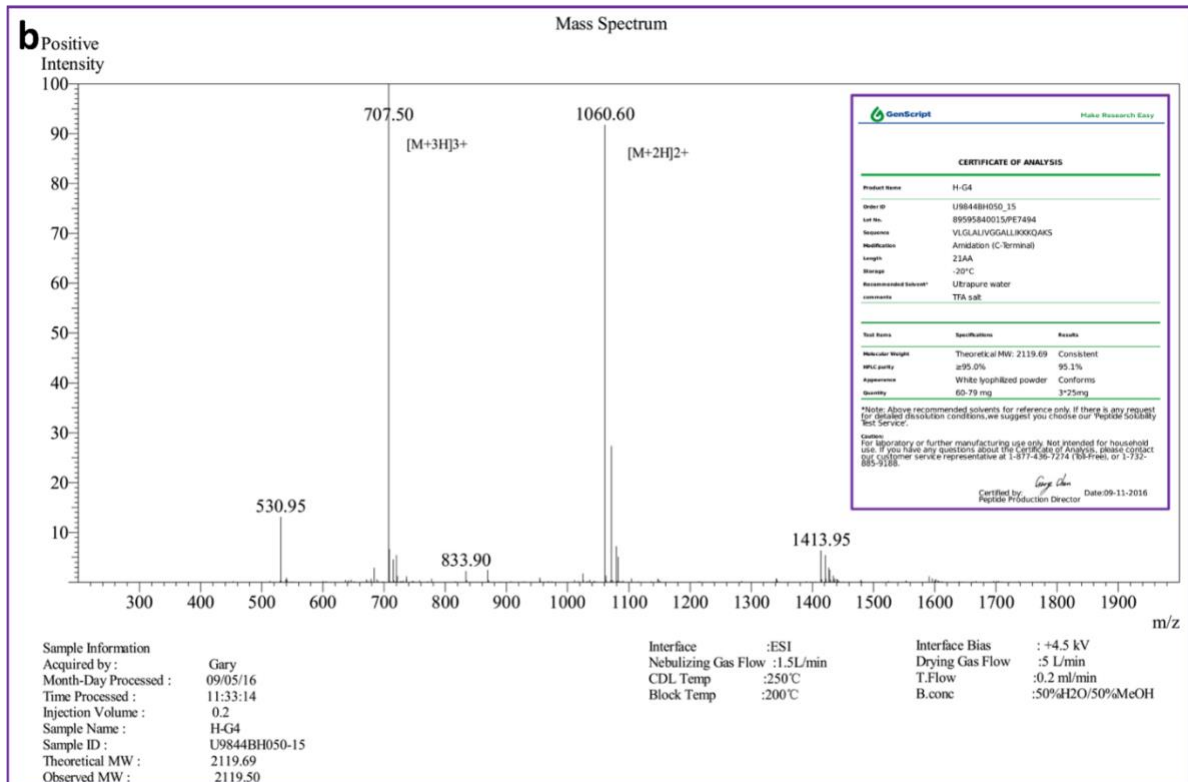

**Supplementary Figure 1. Mass spectrometry and certificate of analysis (COA) report for AMP chemical synthesis: a) HG2 and b) HG4. Peptides were synthesised by GenScript Inc. USA. Mass spectrum analysis and COA report show correct molecular weight and purity grade for both peptides.**

|              |   | Negative control |       | Growth |       | HG2   |   | HG4 treated |       |   |       |       |    |         |
|--------------|---|------------------|-------|--------|-------|-------|---|-------------|-------|---|-------|-------|----|---------|
|              |   | 1                | 2     | 3      | 4     | 5     | 6 | 7           | 8     | 9 | 10    | 11    | 12 |         |
| Plate Layout | A |                  |       |        |       |       |   |             |       |   |       |       |    | Well ID |
|              | B |                  | CTL2  |        | CTL1  | CTL1  |   | SPL1        | SPL7  |   | SPL13 | SPL19 |    | Well ID |
|              | C |                  | CTL2  |        | CTL1  | CTL1  |   | SPL2        | SPL8  |   | SPL14 | SPL20 |    | Well ID |
|              | D |                  | CTL2  |        | CTL1  | CTL1  |   | SPL3        | SPL9  |   | SPL15 | SPL21 |    | Well ID |
|              | E |                  | CTL2  |        | CTL1  | CTL1  |   | SPL4        | SPL10 |   | SPL16 | SPL22 |    | Well ID |
|              | F |                  | CTL2  |        | CTL1  | CTL1  |   | SPL5        | SPL11 |   | SPL17 | SPL23 |    | Well ID |
|              | G |                  | CTL2  |        | CTL1  | CTL1  |   | SPL6        | SPL12 |   | SPL18 | SPL24 |    | Well ID |
|              | H |                  |       |        |       |       |   |             |       |   |       |       |    | Well ID |
| 0.25x MIC    | A |                  |       |        |       |       |   |             |       |   |       |       |    | 570     |
|              | B |                  | 0.049 |        | 1.249 | 1.966 |   | 1.701       | 1.634 |   | 1.762 | 1.534 |    | 570     |
|              | C |                  | 0.044 |        | 1.404 | 1.691 |   | 1.855       | 1.56  |   | 1.657 | 1.602 |    | 570     |
|              | D |                  | 0.051 |        | 1.408 | 1.453 |   | 1.112       | 1.15  |   | 1.384 | 1.207 |    | 570     |
|              | E |                  | 0.047 |        | 1.429 | 1.345 |   | 1.546       | 1.238 |   | 1.845 | 1.308 |    | 570     |
|              | F |                  | 0.045 |        | 0.842 | 1.039 |   | 1.001       | 1.108 |   | 1.462 | 0.948 |    | 570     |
|              | G |                  | 0.048 |        | 0.696 | 0.846 |   | 0.7         | 1.079 |   | 1.033 | 0.983 |    | 570     |
|              | H |                  |       |        |       |       |   |             |       |   |       |       |    | 570     |
| 0.5x MIC     | A |                  |       |        |       |       |   |             |       |   |       |       |    | 570     |
|              | B |                  | 0.05  |        | 1.303 | 1.291 |   | 1.416       | 1.325 |   | 1.425 | 1.442 |    | 570     |
|              | C |                  | 0.043 |        | 1.544 | 1.218 |   | 1.296       | 1.213 |   | 1.327 | 1.356 |    | 570     |
|              | D |                  | 0.052 |        | 1.305 | 1.241 |   | 1.288       | 1.355 |   | 1.272 | 1.143 |    | 570     |
|              | E |                  | 0.055 |        | 1.361 | 1.143 |   | 1.62        | 1.456 |   | 1.211 | 1.248 |    | 570     |
|              | F |                  | 0.047 |        | 1.355 | 1.317 |   | 1.381       | 1.318 |   | 0.968 | 1.023 |    | 570     |
|              | G |                  | 0.047 |        | 1.093 | 0.846 |   | 1.044       | 1.06  |   | 1.026 | 1.001 |    | 570     |
|              | H |                  |       |        |       |       |   |             |       |   |       |       |    | 570     |
| MIC          | A |                  |       |        |       |       |   |             |       |   |       |       |    | 570     |
|              | B |                  | 0.055 |        | 2.038 | 1.586 |   | 1.457       | 1.604 |   | 1.231 | 1.319 |    | 570     |
|              | C |                  | 0.058 |        | 1.853 | 1.774 |   | 0.908       | 1.018 |   | 1.143 | 1.174 |    | 570     |
|              | D |                  | 0.052 |        | 1.66  | 2.106 |   | 1.39        | 1.446 |   | 1.363 | 1.111 |    | 570     |
|              | E |                  | 0.053 |        | 1.921 | 2.185 |   | 1.335       | 1.394 |   | 0.982 | 0.799 |    | 570     |
|              | F |                  | 0.05  |        | 1.389 | 1.432 |   | 0.758       | 1.373 |   | 1.1   | 0.868 |    | 570     |
|              | G |                  | 0.052 |        | 1.397 | 1.483 |   | 1.137       | 1.092 |   | 0.664 | 1.569 |    | 570     |
|              | H |                  |       |        |       |       |   |             |       |   |       |       |    | 570     |
| 2x MIC       | A |                  |       |        |       |       |   |             |       |   |       |       |    | 570     |
|              | B |                  | 0.041 |        | 1.569 | 1.366 |   | 0.426       | 0.459 |   | 0.346 | 0.374 |    | 570     |
|              | C |                  | 0.042 |        | 1.082 | 1.48  |   | 0.4         | 0.428 |   | 0.338 | 0.275 |    | 570     |
|              | D |                  | 0.045 |        | 1.25  | 1.324 |   | 0.45        | 0.529 |   | 0.275 | 0.333 |    | 570     |
|              | E |                  | 0.043 |        | 1.136 | 1.273 |   | 0.497       | 1.119 |   | 0.114 | 0.622 |    | 570     |
|              | F |                  | 0.041 |        | 1.372 | 1.519 |   | 0.641       | 0.595 |   | 0.656 | 0.613 |    | 570     |
|              | G |                  | 0.039 |        | 0.987 | 0.993 |   | 0.351       | 0.72  |   | 0.479 | 0.631 |    | 570     |
|              | H |                  |       |        |       |       |   |             |       |   |       |       |    | 570     |
| 4x MIC       | A |                  |       |        |       |       |   |             |       |   |       |       |    | 570     |
|              | B |                  | 0.041 |        | 1.125 | 1.26  |   | 0.212       | 0.276 |   | 0.143 | 0.115 |    | 570     |
|              | C |                  | 0.043 |        | 1.316 | 1.585 |   | 0.205       | 0.199 |   | 0.208 | 0.358 |    | 570     |
|              | D |                  | 0.045 |        | 0.963 | 1.117 |   | 0.08        | 0.142 |   | 0.155 | 0.133 |    | 570     |
|              | E |                  | 0.04  |        | 1.197 | 1.225 |   | 0.316       | 0.133 |   | 0.145 | 0.139 |    | 570     |
|              | F |                  | 0.038 |        | 1.028 | 1.209 |   | 0.364       | 0.388 |   | 0.126 | 0.118 |    | 570     |
|              | G |                  | 0.041 |        | 1.105 | 1.153 |   | 0.202       | 0.378 |   | 0.078 | 0.088 |    | 570     |
|              | H |                  |       |        |       |       |   |             |       |   |       |       |    | 570     |

**Supplementary Figure 2. AMP anti-biofilm activity against MRSA USA300 assay plate output in heatmap format:** Showing assay plate layout and representative images at the five AMP concentrations tested. Intensity of biofilms ranging from dark blue in the untreated samples (growth control) to very light blue in the HG2 and HG4 treated and samples (at supra-MIC concentrations) and negative controls containing sterile MH broth only.

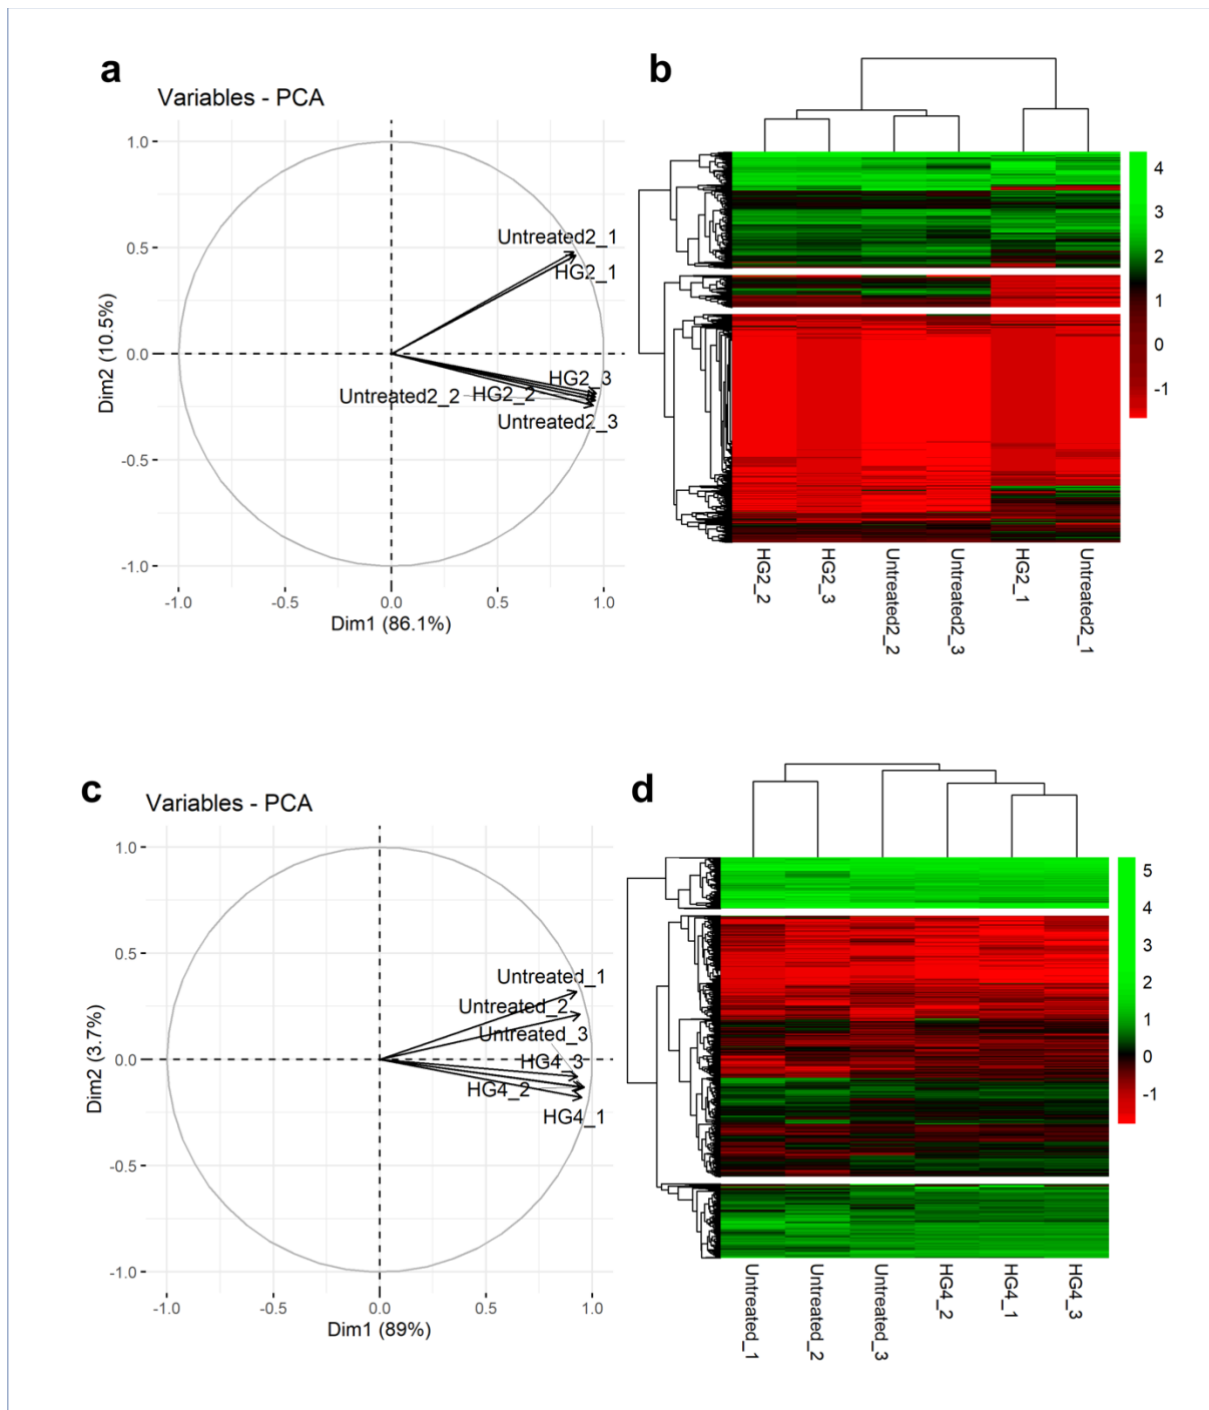

**Supplementary Figure 3. Transcriptomic analysis of peptide activity MRSA USA300: a)** Principal component plot and **b)** Hierarchical Clustering analysis plot before outlier removal in HG2 treated group. **c)** Principal component plot and **d)** Hierarchical Clustering analysis plot before outlier removal HG4 treated group. HG2\_1 and Untreated2\_1 being group/treatment outliers and Untreated\_3 is an outlier in the HG4 treatment group. PCA plot on samples, showing clustering results of similar display patterns of Untreated\_3. Heatmap displaying hierarchical clustering of samples and gene expression, also displaying similar expression patterns of Untreated\_3 as compared to the rest.

**Supplementary Table 1. Summary of results from computation steps used to identify novel AMPs from the Hess et al, 2011 cow rumen metagenome dataset.**

| <b>Fusion project</b> | <b>First sequence number</b> | <b>Number of sequences</b> | <b>Number of sequences after first filtering</b> | <b>Candidates fulfilling distance criteria</b> |
|-----------------------|------------------------------|----------------------------|--------------------------------------------------|------------------------------------------------|
| <b>0a</b>             | 1                            | 100000                     | 35027                                            | 32                                             |
| <b>0b</b>             | 100001                       | 100000                     | 33247                                            | 33                                             |
| <b>1a</b>             | 200001                       | 100000                     | 32561                                            | 27                                             |
| <b>1b</b>             | 300001                       | 100000                     | 37820                                            | 37                                             |
| <b>2a</b>             | 400001                       | 100000                     | 39000                                            | 32                                             |
| <b>2b</b>             | 500001                       | 100000                     | 38806                                            | 42                                             |
| <b>3a</b>             | 600001                       | 100000                     | 32499                                            | 35                                             |
| <b>3b</b>             | 700001                       | 100000                     | 28537                                            | 19                                             |
| <b>4a</b>             | 800001                       | 100000                     | 28701                                            | 29                                             |
| <b>4b</b>             | 900001                       | 100000                     | 33811                                            | 11                                             |
| <b>5a</b>             | 1000001                      | 100000                     | 34135                                            | 35                                             |
| <b>5b</b>             | 1100001                      | 100000                     | 38599                                            | 42                                             |
| <b>6a</b>             | 1200001                      | 100000                     | 31472                                            | 29                                             |
| <b>6b</b>             | 1300001                      | 100000                     | 35397                                            | 21                                             |
| <b>7a</b>             | 1400001                      | 100000                     | 38893                                            | 26                                             |
| <b>7b</b>             | 1500001                      | 100000                     | 40084                                            | 30                                             |
| <b>8a</b>             | 1600001                      | 100000                     | 40459                                            | 40                                             |
| <b>8b</b>             | 1700001                      | 100000                     | 40718                                            | 41                                             |
| <b>9a</b>             | 1800001                      | 100000                     | 40593                                            | 22                                             |
| <b>9b</b>             | 1900001                      | 100000                     | 40600                                            | 23                                             |
| <b>10a</b>            | 2000001                      | 100000                     | 40460                                            | 36                                             |
| <b>10b</b>            | 2100001                      | 100000                     | 40688                                            | 46                                             |
| <b>11a</b>            | 2200001                      | 100000                     | 34674                                            | 41                                             |
| <b>11b</b>            | 2300001                      | 100000                     | 31152                                            | 31                                             |
| <b>12a</b>            | 2400001                      | 100000                     | 33339                                            | 36                                             |
| <b>12b</b>            | 2500001                      | 47270                      | 16364                                            | 33                                             |
| <b>SUM</b>            |                              | <b>2547270</b>             | <b>917636</b>                                    | <b>829</b>                                     |

**Supplementary Table 2. Six most promising antimicrobial peptide candidates (HG1-HG6) identified in cow rumen metagenome dataset**

| Assigned name | Sequence                                                 | Amino acid (AA) (length) | Location on cow dataset                                                           | Most similar homolog on APD2 (stop codon '*' removed) |              |
|---------------|----------------------------------------------------------|--------------------------|-----------------------------------------------------------------------------------|-------------------------------------------------------|--------------|
|               |                                                          |                          |                                                                                   | APD ID                                                | Similarity % |
| <b>HG1</b>    | VKKAPAKKAAPKAAAKENVKAAA<br>APATKSTKKPKKV                 | 37                       | NODE_3603970_length_23<br>7431_cov_15.909123_orf_<br>36410_39090..39200           | AP00537                                               | 45%          |
| <b>HG2</b>    | MKKLLLLIFCLALALAGCKKAP                                   | 22                       | NODE_664976_length_197<br>40_cov_2.033485_orf_008<br>10_19724..19789              | AP00494                                               | 40%          |
| <b>HG3</b>    | LLFLALSLLFQLLFPLFLFAFEQQAL<br>PFLFLLPLFLLASFQLPLSLFFQLLL | 53                       | NODE_4144838_length_47<br>00_cov_0.195319_orf_383<br>00_3..161                    | AP01999                                               | 30.76%       |
| <b>HG4</b>    | VLGLALIVGGALLIKKKQAKS                                    | 21                       | NODE_3958153_length_85<br>376_cov_8.525382_orf_20<br>3250_82784..82849            | AP01737                                               | 48%          |
| <b>HG5</b>    | LFGGGGGTGGFGLGGPGGNGPG<br>GGGGPGGNVPGS                   | 35                       | NODE_793869_length_308<br>5_cov_43.351379_orf_341<br>40<br>complement(2443..2547) | AP02183                                               | 52.50%       |
| <b>HG6</b>    | MLSFLFMQKLMKKKLRKRKLLK<br>RLLKKKLLKQLKRFLKRKFL           | 47                       | NODE_2576652_length_45<br>57_cov_3.402019_orf_040<br>80_350..490                  | AP01010                                               | 36.17%       |



NNNNNNNNNNNNNNNNNNNNNNNNNNNNNNNNNNNNNNNNNNNNNNNN  
NNNNNTTGGGTCGTCGTCTTGAAGTTGC  
GCAAGTGCCTGGAATGTTGCCAGAAGGTT  
TNNNNNNNNNNNT**GTGCTTGGCCTTGCACT**  
**GATTGTCGGTGGAGCTTTGCTTATCAAG**  
**AAGAAACAGGCGAAATCTTAATTTGCGC**  
**CATCACGATGGCGACCATCATAATNNNN**  
**NNNNNAAGCGCGCTTCTTCGTTGCGTC**  
**TTGGCCTTGTGCTGATTGTCGGTGGAGC**  
**CTTGCTCATCAAGAAGAGGCAGGCGAAAT**  
CTTAATTTGCGCCATCACGATGGCGACCAT  
CATAATGGCACAACCGCAAATCTCGCGGGC  
TGAAAGCTGTTCTCCTAGAATGGCCCAACC  
CGCAAGGACGGCGAATACCGATTCCAGACT  
CATCGTGAGTGAGGCGATGGTGGGGTTGAT  
TTTATCT  
ATGATATCGTTAAATATCTTTACGCTTCTTT  
GACGCTTATATACTTCCATAATACCGCGAA  
CAGGATGTCTAGGTGTAGGCCAAATACTTA  
ATTCTTTTTCCTTATCGTTATATCTTACCTGA  
TATGCTTCCACCGAAATCAAGCTTTGCTTGTT  
CAAGCCACATAAGAGCTGCATTCCAGTTAC  
CGAGAACATCACCGAAACCTGCAGAGTTTC  
CATAGCATGCGCCACGGAATATACTGGAAG  
TATTCATACTCATGACGGAATCATACAATG  
CATTATGCGGCAATGTGAAGAGTTCATTGA  
TATCGCCAATCCAGTTTGCGGTCTGGAAAT  
CGATAACTTCTTCAAGTTCTTGGCAAATCTT  
ATAATGCGTCCTGCCAGGTTGCAATTCCATT  
ACAAGATAGTCACGATAGTTACCCTGTGCGC  
GCATAATATCTCTGCACATATCGAATCATG  
TCGGCGATGATGTAATTAATTGTTGCTCAC  
TGATTTCAATACAGATTACAGGAGCGCCGA  
GCATTAACCTTATATAGTTACGCATTTGCGC  
CATATTCTGTATCATCGTAGATTGAGTACA  
GGGTCGCAAT**TGTTGCGGCGGAGGTG**  
**GAACAGGCGGTTTTGGCCTTGGCGGACC**  
**CGGTGAAACGGACCCGGCGGAGGAGG**  
**CGGTCCTGGCGGAATGTGCCTGGTTCA**  
**TAGCCCGGAGGAGGCGGTTTCAATCGTGAC**

H-G5

|        |                 |
|--------|-----------------|
| LFGGG  |                 |
| GTGGFG |                 |
| LGGPGG | on              |
| NGPGGG | complementar    |
| GGPGGN | y strand of     |
| VPGS   | scaffold (full) |

2443-2547/3'-5'



CTTGAACCGGTCGGCGGCATTATAGGATCA  
CGCATAGGCATTA AATTATCGTCAATTACA  
TCACTCAT

ATGCTATCATTCCATTTCATGCAGAAGCT  
GATGAAGAAGAAGTTGAAGCGGAGGAAG  
AAGTTGAAGCTGAAGAGGCTCCTGTTGA  
AGAAGAAGCTGTTGAAGAAGCAGTTGAA  
GAGATCCTGAAGAGGAAGTTTCTTTAG

MLSFLF  
MQKLM  
KKLKR  
RKKLKL  
KRLLK  
KKLLK  
QLKRFL  
KRKFL

H-G6

350-490/5'-3'

full gene

---

Supplementary Table 4. eggNOG mapper Annotations for HG2 and HG4 containing contigs

| query                        | seed_ortholog          | evalue    | score | eggNOG_OGs                                                                                                                                                         | max_annot_lvl             | COG_category                                                             | Description                                                                                                                                                       | Preferred_name | GOs                                                                                                                                                                                                                                                                                                                                                                                                                                                                                                                                                                                                                                                                                                                                                                                                                                                      | EC       | KEGG_ko             |
|------------------------------|------------------------|-----------|-------|--------------------------------------------------------------------------------------------------------------------------------------------------------------------|---------------------------|--------------------------------------------------------------------------|-------------------------------------------------------------------------------------------------------------------------------------------------------------------|----------------|----------------------------------------------------------------------------------------------------------------------------------------------------------------------------------------------------------------------------------------------------------------------------------------------------------------------------------------------------------------------------------------------------------------------------------------------------------------------------------------------------------------------------------------------------------------------------------------------------------------------------------------------------------------------------------------------------------------------------------------------------------------------------------------------------------------------------------------------------------|----------|---------------------|
|                              | 1089553.Tph_c17290     | 8.88e-57  | 195.0 | COG0482@1 root,COG0482@2 Bacteria,1TPIZ@1239 Firmicutes,247YV@186801 Clostridia,42F6N@68295 Thermoanaerobacterales                                                 | 186801 Clostridia         | <b>J - Translation, ribosomal structure and biogenesis</b>               | Catalyzes the 2-thiolation of uridine at the wobble position (U34) of tRNA, leading to the formation of s(2)U34                                                   | mnmA           | -                                                                                                                                                                                                                                                                                                                                                                                                                                                                                                                                                                                                                                                                                                                                                                                                                                                        | 2.8.1.13 | ko:K00566           |
|                              | 1121422.AUMW0100003'   | 7.69e-60  | 196.0 | COG0413@1 root,COG0413@2 Bacteria,1TPZA@1239 Firmicutes,248RR@186801 Clostridia,260CY@186807 Peptococcaceae                                                        | 186801 Clostridia         | <b>H - Coenzyme transport and metabolism</b>                             | Catalyzes the reversible reaction in which hydroxymethyl group from 5,10-methylenetetrahydrofolate is transferred onto alpha-ketoisovalerate to form ketopantoate | panB           | -                                                                                                                                                                                                                                                                                                                                                                                                                                                                                                                                                                                                                                                                                                                                                                                                                                                        | 2.1.2.11 | ko:K00606           |
|                              | 1038860.AXAP01000029_  | 5.84e-50  | 176.0 | COG0166@1 root,COG0166@2 Bacteria,1MUF@1224 Proteobacteria,2TQKP@28211 Alphaproteobacteria,3JWSI@41294 Bradyrhizobiaceae                                           | 28211 Alphaproteobacteria | <b>G- Carbohydrate transport and metabolism</b>                          | Phosphoglucose isomerase                                                                                                                                          | pgi            | GO:0005575,GO:0005622,GO:0005623,GO:0005737,GO:0044424,GO:0044464                                                                                                                                                                                                                                                                                                                                                                                                                                                                                                                                                                                                                                                                                                                                                                                        | 5.3.1.9  | ko:K01810           |
|                              | 1122915.AUGY01000003_  | 5.28e-30  | 113.0 | COG2148@1 root,COG2148@2 Bacteria,1TP7M@1239 Firmicutes,4HCBG@91061 Bacilli,26QNZ@186822 Paenibacillaceae                                                          | 91061 Bacilli             | <b>M - Cell wall/membrane/envelope biogenesis</b>                        | Multidrug MFS transporter                                                                                                                                         | cpsE           | GO:0005575,GO:0005623,GO:0005886,GO:0016020,GO:0044464,GO:0071944                                                                                                                                                                                                                                                                                                                                                                                                                                                                                                                                                                                                                                                                                                                                                                                        | -        | ko:K13012,ko:K19428 |
|                              | 1382358.JHVN01000038_  | 3.06e-41  | 154.0 | COG0518@1 root,COG0519@1 root,COG0518@2 Bacteria,COG0519@2 Bacteria,1TPG8@1239 Firmicutes,4HA7Q@91061 Bacilli,21VJJ@150247 Anoxybacillus                           | 91061 Bacilli             | <b>F - Nucleotide transport and metabolism</b>                           | Catalyzes the synthesis of GMP from XMP                                                                                                                           | guaA           | GO:0003674,GO:0003824,GO:0003921,GO:0003922,GO:0006139,GO:0006163,GO:0006164,GO:0006177,GO:0006725,GO:0006753,GO:0006793,GO:0006796,GO:0006807,GO:0008150,GO:0008152,GO:0009058,GO:0009116,GO:0009117,GO:0009119,GO:0009123,GO:0009124,GO:0009126,GO:0009127,GO:0009150,GO:0009152,GO:0009156,GO:0009161,GO:0009163,GO:0009165,GO:0009167,GO:0009168,GO:0009259,GO:0009260,GO:0009987,GO:0016874,GO:0016879,GO:0016884,GO:0018130,GO:0019438,GO:0019637,GO:0019693,GO:0034404,GO:0034641,GO:0034654,GO:0042278,GO:0042451,GO:0042455,GO:0044237,GO:0044238,GO:0044249,GO:0044271,GO:0044281,GO:0044283,GO:0046037,GO:0046128,GO:0046129,GO:0046390,GO:0046483,GO:0055086,GO:0071704,GO:0072521,GO:0072522,GO:0090407,GO:1901068,GO:1901070,GO:1901135,GO:1901137,GO:1901293,GO:1901360,GO:1901362,GO:1901564,GO:1901566,GO:1901576,GO:1901657,GO:1901659 | 6.3.5.2  | ko:K01951           |
|                              | 765913.ThidrDRAFT_2517 | 1.2e-39   | 155.0 | COG1262@1 root,COG1262@2 Bacteria,1QT7U@1224 Proteobacteria,1RWY0@1236 Gammaproteobacteria,1X0ZN@135613 Chromatiales                                               | 135613 Chromatiales       | <b>S - Function unknown</b>                                              | CDS with the same product name                                                                                                                                    | -              | -                                                                                                                                                                                                                                                                                                                                                                                                                                                                                                                                                                                                                                                                                                                                                                                                                                                        | -        | -                   |
|                              | 1121445.ATUZ01000013_  | 1.23e-24  | 104.0 | COG1624@1 root,COG1624@2 Bacteria,1PEQT@1224 Proteobacteria,42P5A@68525 delta/epsilon subdivisions,2WKPP@28221 Deltaproteobacteria,2M84W@213115 Desulfovibrionales | 28221 Deltaproteobacteria | <b>S - Function unknown</b>                                              | Catalyzes the condensation of 2 ATP molecules into cyclic di-AMP (c-di-AMP), a second messenger used to regulate differing processes in different bacteria        | dacA           | -                                                                                                                                                                                                                                                                                                                                                                                                                                                                                                                                                                                                                                                                                                                                                                                                                                                        | 2.7.7.85 | ko:K18672           |
|                              | 886379.AEWI01000144_g  | 6.8e-71   | 229.0 | COG2148@1 root,COG2148@2 Bacteria,4NER4@976 Bacteroidetes,2FNC2@200643 Bacteroidia,3XIYM@558415 Marinilabiliaceae                                                  | 976 Bacteroidetes         | <b>M - Cell wall/membrane/envelope biogenesis</b>                        | CoA-binding domain                                                                                                                                                | -              | -                                                                                                                                                                                                                                                                                                                                                                                                                                                                                                                                                                                                                                                                                                                                                                                                                                                        | -        | ko:K13012           |
|                              | 1411123.JQNH01000001_  | 4.48e-22  | 98.6  | COG3842@1 root,COG3842@2 Bacteria,1MU3I@1224 Proteobacteria,2TQMJ@28211 Alphaproteobacteria                                                                        | 28211 Alphaproteobacteria | <b>P - Inorganic ion transport and metabolism</b>                        | Part of the ABC transporter complex PotABCD involved in spermidine putrescine import. Responsible for energy coupling to the transport system                     | potA           | GO:0005575,GO:0005623,GO:0005886,GO:0006810,GO:0006811,GO:0006812,GO:0008150,GO:0015695,GO:0015696,GO:0015846,GO:0015847,GO:0016020,GO:0016021,GO:0031224,GO:0032991,GO:0043190,GO:0044425,GO:0044459,GO:0044464,GO:0051179,GO:0051234,GO:0071702,GO:0071705,GO:0071944,GO:0098533,GO:0098796,GO:0098797,GO:1902494,GO:1902495,GO:1904949,GO:1990351                                                                                                                                                                                                                                                                                                                                                                                                                                                                                                     | -        | ko:K11076           |
| <b>HG2 containing contig</b> | 247490.KSU1_D1049      | 2.05e-144 | 436.0 | COG1178@1 root,COG1178@2 Bacteria,2J51F@203682 Planctomycetes                                                                                                      | 203682 Planctomycetes     | <b>U - Intracellular trafficking, secretion, and vesicular transport</b> | Binding-protein-dependent transport system inner membrane component                                                                                               | -              | -                                                                                                                                                                                                                                                                                                                                                                                                                                                                                                                                                                                                                                                                                                                                                                                                                                                        | -        | ko:K02011           |
|                              | 1089553.Tph_c17290     | 8.88e-57  | 195.0 | COG0482@1 root,COG0482@2 Bacteria,1TPIZ@1239 Firmicutes,247YV@186801 Clostridia,42F6N@68295 Thermoanaerobacterales                                                 | 186801 Clostridia         | <b>J - Translation, ribosomal structure and biogenesis</b>               | Catalyzes the 2-thiolation of uridine at the wobble position (U34) of tRNA, leading to the formation of s(2)U34                                                   | mnmA           | -                                                                                                                                                                                                                                                                                                                                                                                                                                                                                                                                                                                                                                                                                                                                                                                                                                                        | 2.8.1.13 | ko:K00566           |

|                        |           |       |                                                                                                                                                                    |                           |                                                                          |                                                                                                                                                            |      |                                                                                                                                                                                                                                                                                                                                                                                                                                                                                                                                                                                                                                                                                                                                                                                                                                                          |           |                     |
|------------------------|-----------|-------|--------------------------------------------------------------------------------------------------------------------------------------------------------------------|---------------------------|--------------------------------------------------------------------------|------------------------------------------------------------------------------------------------------------------------------------------------------------|------|----------------------------------------------------------------------------------------------------------------------------------------------------------------------------------------------------------------------------------------------------------------------------------------------------------------------------------------------------------------------------------------------------------------------------------------------------------------------------------------------------------------------------------------------------------------------------------------------------------------------------------------------------------------------------------------------------------------------------------------------------------------------------------------------------------------------------------------------------------|-----------|---------------------|
| 1121422.AUMW0100003_   | 7.69e-60  | 196.0 | COG0413@1 root,COG0413@2 Bacteria,1TPZA@1239 Firmicutes,248RR@186801 Clostridia,260CY@186807 Peptococcaceae                                                        | 186801 Clostridia         | <b>H - Coenzyme transport and metabolism</b>                             | Catalyzes the reversible reaction in which hydroxymethyl group from 5,10-methylenetetrahydrofolate is transferred onto alpha-ketopantoate to form          | panB | -                                                                                                                                                                                                                                                                                                                                                                                                                                                                                                                                                                                                                                                                                                                                                                                                                                                        | 2.1.2.11  | ko:K00606           |
| 1038860.AXAP01000029_  | 5.84e-50  | 176.0 | COG0166@1 root,COG0166@2 Bacteria,1MUFP@1224 Proteobacteria,2TQKP@28211 Alphaproteobacteria,3JWSI@41294 Bradyrhizobiaceae                                          | 28211 Alphaproteobacteria | <b>G - Carbohydrate transport and metabolism</b>                         | Phosphoglucose isomerase                                                                                                                                   | pgi  | GO:0005575,GO:0005622,GO:0005623,GO:0005737,GO:0044424,GO:0044464                                                                                                                                                                                                                                                                                                                                                                                                                                                                                                                                                                                                                                                                                                                                                                                        | 5.3.1.9   | ko:K01810           |
| 1122915.AUGY01000003_  | 5.28e-30  | 113.0 | COG2148@1 root,COG2148@2 Bacteria,1TP7M@1239 Firmicutes,4HCBG@91061 Bacilli,26QNZ@186822 Paenibacillaceae                                                          | 91061 Bacilli             | <b>M - Cell wall/membrane/envelope biogenesis</b>                        | Multidrug MFS transporter                                                                                                                                  | cpsE | GO:0005575,GO:0005623,GO:0005886,GO:0016020,GO:0044464,GO:0071944                                                                                                                                                                                                                                                                                                                                                                                                                                                                                                                                                                                                                                                                                                                                                                                        | -         | ko:K13012,ko:K19428 |
| 1382358.JHVN01000038_  | 3.06e-41  | 154.0 | COG0518@1 root,COG0519@1 root,COG0518@2 Bacteria,COG0519@2 Bacteria,1TPG8@1239 Firmicutes,4HA7Q@91061 Bacilli,21VJJ@150247 Anoxybacillus                           | 91061 Bacilli             | <b>F - Nucleotide transport and metabolism</b>                           | Catalyzes the synthesis of GMP from XMP                                                                                                                    | guaA | GO:0003674,GO:0003824,GO:0003921,GO:0003922,GO:0006139,GO:0006163,GO:0006164,GO:0006177,GO:0006725,GO:0006753,GO:0006793,GO:0006796,GO:0006807,GO:0008150,GO:0008152,GO:0009058,GO:0009116,GO:0009117,GO:0009119,GO:0009123,GO:0009124,GO:0009126,GO:0009127,GO:0009150,GO:0009152,GO:0009156,GO:0009161,GO:0009163,GO:0009165,GO:0009167,GO:0009168,GO:0009259,GO:0009260,GO:0009987,GO:0016874,GO:0016879,GO:0016884,GO:0018130,GO:0019438,GO:0019637,GO:0019693,GO:0034404,GO:0034641,GO:0034654,GO:0042278,GO:0042451,GO:0042455,GO:0044237,GO:0044238,GO:0044249,GO:0044271,GO:0044281,GO:0044283,GO:0046037,GO:0046128,GO:0046129,GO:0046390,GO:0046483,GO:0055086,GO:0071704,GO:0072521,GO:0072522,GO:0090407,GO:1901068,GO:1901070,GO:1901135,GO:1901137,GO:1901293,GO:1901360,GO:1901362,GO:1901564,GO:1901566,GO:1901576,GO:1901657,GO:1901659 | 6.3.5.2   | ko:K01951           |
| 765913.ThidrDRAFT_2517 | 1.2e-39   | 155.0 | COG1262@1 root,COG1262@2 Bacteria,1QT7U@1224 Proteobacteria,1RWY0@1236 Gammaproteobacteria,1X0ZN@135613 Chromatiales                                               | 135613 Chromatiales       | <b>S - Function unknown</b>                                              | CDS with the same product name                                                                                                                             | -    | -                                                                                                                                                                                                                                                                                                                                                                                                                                                                                                                                                                                                                                                                                                                                                                                                                                                        | -         | -                   |
| 1121445.ATUZ01000013_  | 1.23e-24  | 104.0 | COG1624@1 root,COG1624@2 Bacteria,1PEQT@1224 Proteobacteria,42P5A@68525 delta/epsilon subdivisions,2WKPP@28221 Deltaproteobacteria,2M84W@213115 Desulfovibrionales | 28221 Deltaproteobacteria | <b>S - Function unknown</b>                                              | Catalyzes the condensation of 2 ATP molecules into cyclic di-AMP (c-di-AMP), a second messenger used to regulate differing processes in different bacteria | dacA | -                                                                                                                                                                                                                                                                                                                                                                                                                                                                                                                                                                                                                                                                                                                                                                                                                                                        | 2.7.7.85  | ko:K18672           |
| 886379.AEWI01000144_g  | 6.8e-71   | 229.0 | COG2148@1 root,COG2148@2 Bacteria,4NER4@976 Bacteroidetes,2FNC2@200643 Bacteroidia,3XIYM@558415 Marinilibaliaceae                                                  | 976 Bacteroidetes         | <b>M - Cell wall/membrane/envelope biogenesis</b>                        | CoA-binding domain                                                                                                                                         | -    | -                                                                                                                                                                                                                                                                                                                                                                                                                                                                                                                                                                                                                                                                                                                                                                                                                                                        | -         | ko:K13012           |
| 1411123.JQNH01000001_  | 4.48e-22  | 98.6  | COG3842@1 root,COG3842@2 Bacteria,1MU3I@1224 Proteobacteria,2TQMJ@28211 Alphaproteobacteria                                                                        | 28211 Alphaproteobacteria | <b>P - Inorganic ion transport and metabolism</b>                        | Part of the ABC transporter complex PotABCD involved in spermidine putrescine import. Responsible for energy coupling to the transport system              | potA | GO:0005575,GO:0005623,GO:0005886,GO:0006810,GO:0006811,GO:0006812,GO:0008150,GO:0015695,GO:0015696,GO:0015846,GO:0015847,GO:0016020,GO:0016021,GO:0031224,GO:0032991,GO:0043190,GO:0044425,GO:0044459,GO:0044464,GO:0051179,GO:0051234,GO:0071702,GO:0071705,GO:0071944,GO:0098533,GO:0098796,GO:0098797,GO:1902494,GO:1902495,GO:1904949,GO:1990351                                                                                                                                                                                                                                                                                                                                                                                                                                                                                                     | -         | ko:K11076           |
| 247490.KSU1_D1049      | 2.05e-144 | 436.0 | COG1178@1 root,COG1178@2 Bacteria,2J51F@203682 Planctomycetes                                                                                                      | 203682 Planctomycetes     | <b>U - Intracellular trafficking, secretion, and vesicular transport</b> | Binding-protein-dependent transport system inner membrane component                                                                                        | -    | -                                                                                                                                                                                                                                                                                                                                                                                                                                                                                                                                                                                                                                                                                                                                                                                                                                                        | -         | ko:K02011           |
| 59374.Fisuc_2251       | 2.89e-222 | 622.0 | COG2148@1 root,COG2148@2 Bacteria                                                                                                                                  | 2 Bacteria                | <b>M - Cell wall/membrane/envelope biogenesis</b>                        | undecaprenyl-phosphate glucose phosphotransferase activity                                                                                                 | cpsE | GO:0005575,GO:0005623,GO:0005886,GO:0016020,GO:0044464,GO:0071944                                                                                                                                                                                                                                                                                                                                                                                                                                                                                                                                                                                                                                                                                                                                                                                        | -         | ko:K13012           |
| 59374.Fisuc_0672       | 7.05e-167 | 468.0 | COG1178@1 root,COG1178@2 Bacteria                                                                                                                                  | 2 Bacteria                | <b>J - Translation, ribosomal structure and biogenesis</b>               | tRNA pseudouridine synthase activity                                                                                                                       | truA | GO:0000049,GO:0001522,GO:0003674,GO:0003676,GO:0003723,GO:0003824,GO:0005488,GO:0005575,GO:0005618,GO:0005623,GO:0006139,GO:0006396,GO:0006399,GO:0006400,GO:0006725,GO:0006807,GO:0008033,GO:0008150,GO:0008152,GO:0009451,GO:0009982,GO:0009987,GO:0010467,GO:0016070,GO:0016853,GO:0016866,GO:0030312,GO:0031119,GO:0034470,GO:0034641,GO:0034660,GO:0040007,GO:0043170,GO:0043412,GO:0044237,GO:0044238,GO:0044464,GO:0046483,GO:0071704,GO:0071944,GO:0090304,GO:0097159,GO:1901360,GO:1901363                                                                                                                                                                                                                                                                                                                                                      | 5.4.99.12 | ko:K06173           |
| 59374.Fisuc_2039       | 3.95e-53  | 181.0 | COG2199@1 root,COG3706@2 Bacteria                                                                                                                                  | 2 Bacteria                | <b>T - Signal transduction mechanisms</b>                                | GGDEF domain                                                                                                                                               | -    | -                                                                                                                                                                                                                                                                                                                                                                                                                                                                                                                                                                                                                                                                                                                                                                                                                                                        | -         | -                   |

|                                      |           |       |                                                                                                                         |                        |                                                                                                                                                         |                                                            |      |   |   |   |                                                                                                                                                                                                                                                                                                                                                                                                                                                                                                     |                                                   |                     |
|--------------------------------------|-----------|-------|-------------------------------------------------------------------------------------------------------------------------|------------------------|---------------------------------------------------------------------------------------------------------------------------------------------------------|------------------------------------------------------------|------|---|---|---|-----------------------------------------------------------------------------------------------------------------------------------------------------------------------------------------------------------------------------------------------------------------------------------------------------------------------------------------------------------------------------------------------------------------------------------------------------------------------------------------------------|---------------------------------------------------|---------------------|
| 59374.Fisuc_2038                     | 3.48e-211 | 610.0 | COG1032@1 root,COG5011@1 root,COG1032@2 Bacteria,COG5011@2 Bacteria                                                     | 2 Bacteria             | <b>C - Energy production and conversion</b>                                                                                                             | Protein conserved in bacteria                              | -    | - | - | - | GO:0003674,GO:0003824,GO:0004412,GO:0005575,GO:0005618,GO:0005623,GO:0005886,GO:0006082,GO:0006520,GO:0006566,GO:0006807,GO:0008150,GO:0008152,GO:0008652,GO:0009058,GO:0009066,GO:0009067,GO:0009088,GO:0009987,GO:0016020,GO:0016053,GO:0016491,GO:0016614,GO:0016616,GO:0019752,GO:0030312,GO:0040007,GO:0043436,GO:0044237,GO:0044238,GO:0044249,GO:0044281,GO:0044283,GO:0044464,GO:0046394,GO:0055114,GO:0071704,GO:0071944,GO:1901564,GO:1901566,GO:1901576,GO:1901605,GO:1901607            | 1.1.1.3                                           | ko:K00003           |
| 59374.Fisuc_2253                     | 1.24e-42  | 150.0 | COG0460@1 root,COG0460@2 Bacteria                                                                                       | 2 Bacteria             | <b>E - Amino acid transport and metabolism</b>                                                                                                          | homoserine dehydrogenase activity                          | hom  | - | - | - | GO:0000271,GO:0003674,GO:0003824,GO:0005975,GO:0005976,GO:0006629,GO:0008150,GO:0008152,GO:0008610,GO:0008653,GO:0009058,GO:0009059,GO:0009103,GO:0009243,GO:0009987,GO:0016051,GO:0016740,GO:0016772,GO:0016780,GO:0033692,GO:0034637,GO:0034645,GO:0043170,GO:0044237,GO:0044238,GO:0044249,GO:0044255,GO:0044260,GO:0044262,GO:0044264,GO:0046402,GO:0071704,GO:1901135,GO:1901137,GO:1901576,GO:1903509                                                                                         | 2.4.1.187,2.7.8.40                                | ko:K05946,ko:K21303 |
| 59374.Fisuc_2254                     | 9.4e-271  | 748.0 | COG1086@1 root,COG2148@1 root,COG1086@2 Bacteria,COG2148@2 Bacteria                                                     | 2 Bacteria             | <b>M - Cell wall/membrane/envelope biogenesis</b>                                                                                                       | undecaprenyl-phosphate glucose phosphotransferase activity | wcaJ | - | - | - | GO:0000271,GO:0003674,GO:0003824,GO:0005975,GO:0005976,GO:0006629,GO:0008150,GO:0008152,GO:0008610,GO:0008653,GO:0009058,GO:0009059,GO:0009103,GO:0009243,GO:0009987,GO:0016051,GO:0016740,GO:0016772,GO:0016780,GO:0033692,GO:0034637,GO:0034645,GO:0043170,GO:0044237,GO:0044238,GO:0044249,GO:0044255,GO:0044260,GO:0044262,GO:0044264,GO:0046402,GO:0071704,GO:1901135,GO:1901137,GO:1901576,GO:1903509                                                                                         | 2.4.1.187,2.7.8.40                                | ko:K05946,ko:K21303 |
| 59374.Fisuc_2039                     | 2.45e-77  | 249.0 | COG2199@1 root,COG3706@2 Bacteria                                                                                       | 2 Bacteria             | <b>T - Signal transduction mechanisms</b>                                                                                                               | GGDEF domain                                               | -    | - | - | - | -                                                                                                                                                                                                                                                                                                                                                                                                                                                                                                   | -                                                 | -                   |
| 59374.Fisuc_2038                     | 4.32e-280 | 786.0 | COG1032@1 root,COG5011@1 root,COG1032@2 Bacteria,COG5011@2 Bacteria                                                     | 2 Bacteria             | <b>C - Energy production and conversion</b>                                                                                                             | Protein conserved in bacteria                              | -    | - | - | - | -                                                                                                                                                                                                                                                                                                                                                                                                                                                                                                   | -                                                 | -                   |
| 59374.Fisuc_2027                     | 3.22e-142 | 407.0 | COG1989@1 root,COG1989@2 Bacteria                                                                                       | 2 Bacteria             | <b>NOU : (N- Cell motility O- Post-translational modification, protein turnover, chaperone functions, and U - Intracellular trafficking, secretion,</b> | aspartic-type endopeptidase activity                       | pilD | - | - | - | 3.4.23.43                                                                                                                                                                                                                                                                                                                                                                                                                                                                                           | ko:K02236,ko:K02278,ko:K02506,ko:K02654,ko:K10966 |                     |
| 935863.<br>AWZR01000001_gene17<br>58 | 1.62e-08  | 60.1  | COG2091@1 root,COG2091@2 Bacteria,1MZHC@1224 Proteobacteria,1S466@1236 Gammaproteobacteria,1X71D@135614 Xanthomonadales | 135614 Xanthomonadales | <b>H - Coenzyme transport and metabolism</b>                                                                                                            | Belongs to the P-Pant transferase superfamily              | hetI | - | - | - | -                                                                                                                                                                                                                                                                                                                                                                                                                                                                                                   | ko:K06133                                         |                     |
| 59374.Fisuc_2027                     | 4.58e-17  | 79.3  | COG1989@1 root,COG1989@2 Bacteria                                                                                       | 2 Bacteria             | <b>NOU</b>                                                                                                                                              | aspartic-type endopeptidase activity                       | pilD | - | - | - | 3.4.23.43                                                                                                                                                                                                                                                                                                                                                                                                                                                                                           | ko:K02236,ko:K02278,ko:K02506,ko:K02654,ko:K10966 |                     |
| 59374.Fisuc_2027                     | 7.73e-146 | 417.0 | COG1989@1 root,COG1989@2 Bacteria                                                                                       | 2 Bacteria             | <b>NOU</b>                                                                                                                                              | aspartic-type endopeptidase activity                       | pilD | - | - | - | 3.4.23.43                                                                                                                                                                                                                                                                                                                                                                                                                                                                                           | ko:K02236,ko:K02278,ko:K02506,ko:K02654,ko:K10966 |                     |
| 59374.Fisuc_2027                     | 1.63e-106 | 315.0 | COG1989@1 root,COG1989@2 Bacteria                                                                                       | 2 Bacteria             | <b>NOU</b>                                                                                                                                              | aspartic-type endopeptidase activity                       | pilD | - | - | - | 3.4.23.43                                                                                                                                                                                                                                                                                                                                                                                                                                                                                           | ko:K02236,ko:K02278,ko:K02506,ko:K02654,ko:K10966 |                     |
| 59374.Fisuc_2039                     | 1.28e-119 | 358.0 | COG2199@1 root,COG3706@2 Bacteria                                                                                       | 2 Bacteria             | <b>T - Signal transduction mechanisms</b>                                                                                                               | GGDEF domain                                               | -    | - | - | - | -                                                                                                                                                                                                                                                                                                                                                                                                                                                                                                   | -                                                 |                     |
| 521003.COLINT_02374                  | 1.43e-22  | 99.4  | COG1032@1 root,COG1032@2 Bacteria,2GJY1@201174 Actinobacteria,4CUXU@84998 Coriobacteriia                                | 84998 Coriobacteriia   | <b>C - Energy production and conversion</b>                                                                                                             | Radical SAM domain protein                                 | -    | - | - | - | -                                                                                                                                                                                                                                                                                                                                                                                                                                                                                                   | -                                                 |                     |
| 68170.<br>KL590505_gene9150          | 3.14e-19  | 89.4  | COG1032@1 root,COG1032@2 Bacteria,2GJY1@201174 Actinobacteria,4DXFP@85010 Pseudonocardiales                             | 201174 Actinobacteria  | <b>C - Energy production and conversion</b>                                                                                                             | Elongator protein 3, MiaB family, Radical SAM              | -    | - | - | - | -                                                                                                                                                                                                                                                                                                                                                                                                                                                                                                   | -                                                 |                     |
| 59374.Fisuc_0672                     | 2.32e-132 | 384.0 | COG0101@1 root,COG0101@2 Bacteria                                                                                       | 2 Bacteria             | <b>J - Translation, ribosomal structure and biogenesis</b>                                                                                              | tRNA pseudouridine synthase activity                       | truA | - | - | - | GO:0000049,GO:0001522,GO:0003674,GO:0003676,GO:0003723,GO:0003824,GO:0005488,GO:0005575,GO:0005618,GO:0005623,GO:0006139,GO:0006396,GO:0006399,GO:0006400,GO:0006725,GO:0006807,GO:0008033,GO:0008150,GO:0008152,GO:0009451,GO:0009982,GO:0009987,GO:0010467,GO:0016070,GO:0016853,GO:0016866,GO:0030312,GO:0031119,GO:0034470,GO:0034641,GO:0034660,GO:0040007,GO:0043170,GO:0043412,GO:0044237,GO:0044238,GO:0044464,GO:0046483,GO:0071704,GO:0071944,GO:0090304,GO:0097159,GO:1901360,GO:1901363 | 5.4.99.12                                         | ko:K06173           |
| 59374.Fisuc_0672                     | 4.39e-32  | 120.0 | COG0101@1 root,COG0101@2 Bacteria                                                                                       | 2 Bacteria             | <b>J - Translation, ribosomal structure and biogenesis</b>                                                                                              | tRNA pseudouridine synthase activity                       | truA | - | - | - | GO:0000049,GO:0001522,GO:0003674,GO:0003676,GO:0003723,GO:0003824,GO:0005488,GO:0005575,GO:0005618,GO:0005623,GO:0006139,GO:0006396,GO:0006399,GO:0006400,GO:0006725,GO:0006807,GO:0008033,GO:0008150,GO:0008152,GO:0009451,GO:0009982,GO:0009987,GO:0010467,GO:0016070,GO:0016853,GO:0016866,GO:0030312,GO:0031119,GO:0034470,GO:0034641,GO:0034660,GO:0040007,GO:0043170,GO:0043412,GO:0044237,GO:0044238,GO:0044464,GO:0046483,GO:0071704,GO:0071944,GO:0090304,GO:0097159,GO:1901360,GO:1901363 | 5.4.99.12                                         | ko:K06173           |

HG4 containing contig

|                               |           |       |                                                                                                                                              |                   |                                                   |                                                                      |      |                                                                                                                                                                                                                                                                                                                                                                                                                                                                                          |                    |                     |
|-------------------------------|-----------|-------|----------------------------------------------------------------------------------------------------------------------------------------------|-------------------|---------------------------------------------------|----------------------------------------------------------------------|------|------------------------------------------------------------------------------------------------------------------------------------------------------------------------------------------------------------------------------------------------------------------------------------------------------------------------------------------------------------------------------------------------------------------------------------------------------------------------------------------|--------------------|---------------------|
| 59374.Fisuc_2251              | 1.62e-233 | 648.0 | COG2148@1 root,COG2148@2 Bacteria                                                                                                            | 2 Bacteria        | <b>M - Cell wall/membrane/envelope biogenesis</b> | undecaprenyl-phosphate glucose phosphotransferase activity           | cpsE | GO:0005575,GO:0005623,GO:0005886,GO:0016020,GO:0044464,GO:0071944                                                                                                                                                                                                                                                                                                                                                                                                                        | -                  | ko:K13012           |
| 59374.Fisuc_2253              | 9.63e-72  | 232.0 | COG0460@1 root,COG0460@2 Bacteria                                                                                                            | 2 Bacteria        | <b>E - Amino acid transport and metabolism</b>    | homoserine dehydrogenase activity                                    | hom  | GO:0003674,GO:0003824,GO:0004412,GO:0005575,GO:0005618,GO:0005623,GO:0005886,GO:0006082,GO:0006520,GO:0006566,GO:0006807,GO:0008150,GO:0008152,GO:0008652,GO:0009058,GO:0009066,GO:0009067,GO:0009088,GO:0009987,GO:0016020,GO:0016053,GO:0016491,GO:0016614,GO:0016616,GO:0019752,GO:0030312,GO:0040007,GO:0043436,GO:0044237,GO:0044238,GO:0044249,GO:0044281,GO:0044283,GO:0044464,GO:0046394,GO:0055114,GO:0071704,GO:0071944,GO:1901564,GO:1901566,GO:1901576,GO:1901605,GO:1901607 | 1.1.1.3            | ko:K00003           |
| 59374.Fisuc_2039              | 2.19e-67  | 221.0 | COG2199@1 root,COG3706@2 Bacteria                                                                                                            | 2 Bacteria        | <b>T - Signal transduction mechanisms</b>         | GGDEF domain                                                         | -    | -                                                                                                                                                                                                                                                                                                                                                                                                                                                                                        | -                  | -                   |
| 59374.Fisuc_2251              | 2.86e-69  | 219.0 | COG2148@1 root,COG2148@2 Bacteria                                                                                                            | 2 Bacteria        | <b>M - Cell wall/membrane/envelope biogenesis</b> | undecaprenyl-phosphate glucose phosphotransferase activity           | cpsE | GO:0005575,GO:0005623,GO:0005886,GO:0016020,GO:0044464,GO:0071944                                                                                                                                                                                                                                                                                                                                                                                                                        | -                  | ko:K13012           |
| 59374.Fisuc_2253              | 3.33e-164 | 470.0 | COG0460@1 root,COG0460@2 Bacteria                                                                                                            | 2 Bacteria        | <b>E - Amino acid transport and metabolism</b>    | homoserine dehydrogenase activity                                    | hom  | GO:0003674,GO:0003824,GO:0004412,GO:0005575,GO:0005618,GO:0005623,GO:0005886,GO:0006082,GO:0006520,GO:0006566,GO:0006807,GO:0008150,GO:0008152,GO:0008652,GO:0009058,GO:0009066,GO:0009067,GO:0009088,GO:0009987,GO:0016020,GO:0016053,GO:0016491,GO:0016614,GO:0016616,GO:0019752,GO:0030312,GO:0040007,GO:0043436,GO:0044237,GO:0044238,GO:0044249,GO:0044281,GO:0044283,GO:0044464,GO:0046394,GO:0055114,GO:0071704,GO:0071944,GO:1901564,GO:1901566,GO:1901576,GO:1901605,GO:1901607 | 1.1.1.3            | ko:K00003           |
| 59374.Fisuc_2253              | 6.94e-67  | 217.0 | COG0460@1 root,COG0460@2 Bacteria                                                                                                            | 2 Bacteria        | <b>E - Amino acid transport and metabolism</b>    | homoserine dehydrogenase activity                                    | hom  | GO:000271,GO:0003674,GO:0003824,GO:0005975,GO:0005976,GO:0006629,GO:0008150,GO:0008152,GO:0008610,GO:0008653,GO:0009058,GO:0009059,GO:0009103,GO:0009243,GO:0009987,GO:0016051,GO:0016740,GO:0016772,GO:0016780,GO:0033692,GO:0034637,GO:0034645,GO:0043170,GO:0044237,GO:0044238,GO:0044249,GO:0044255,GO:0044260,GO:0044262,GO:0044264,GO:0046402,GO:0071704,GO:1901135,GO:1901137,GO:1901576,GO:1903509                                                                               | 1.1.1.3            | ko:K00003           |
| 59374.Fisuc_2254              | 1.63e-82  | 258.0 | COG1086@1 root,COG2148@1 root,COG1086@2 Bacteria,COG2148@2 Bacteria                                                                          | 2 Bacteria        | <b>M - Cell wall/membrane/envelope biogenesis</b> | undecaprenyl-phosphate glucose phosphotransferase activity           | wcaJ | GO:0000271,GO:0003674,GO:0003824,GO:0005975,GO:0005976,GO:0006629,GO:0008150,GO:0008152,GO:0008610,GO:0008653,GO:0009058,GO:0009059,GO:0009103,GO:0009243,GO:0009987,GO:0016051,GO:0016740,GO:0016772,GO:0016780,GO:0033692,GO:0034637,GO:0034645,GO:0043170,GO:0044237,GO:0044238,GO:0044249,GO:0044255,GO:0044260,GO:0044262,GO:0044264,GO:0046402,GO:0071704,GO:1901135,GO:1901137,GO:1901576,GO:1903509                                                                              | 2.4.1.187,2.7.8.40 | ko:K05946,ko:K21303 |
| 59374.Fisuc_2254              | 3.27e-239 | 669.0 | COG1086@1 root,COG2148@1 root,COG1086@2 Bacteria,COG2148@2 Bacteria                                                                          | 2 Bacteria        | <b>M - Cell wall/membrane/envelope biogenesis</b> | undecaprenyl-phosphate glucose phosphotransferase activity           | wcaJ | GO:0000271,GO:0003674,GO:0003824,GO:0005975,GO:0005976,GO:0006629,GO:0008150,GO:0008152,GO:0008610,GO:0008653,GO:0009058,GO:0009059,GO:0009103,GO:0009243,GO:0009987,GO:0016051,GO:0016740,GO:0016772,GO:0016780,GO:0033692,GO:0034637,GO:0034645,GO:0043170,GO:0044237,GO:0044238,GO:0044249,GO:0044255,GO:0044260,GO:0044262,GO:0044264,GO:0046402,GO:0071704,GO:1901135,GO:1901137,GO:1901576,GO:1903509                                                                              | 2.4.1.187,2.7.8.40 | ko:K05946,ko:K21303 |
| 59374.Fisuc_2254              | 1.98e-105 | 318.0 | COG1086@1 root,COG2148@1 root,COG1086@2 Bacteria,COG2148@2 Bacteria                                                                          | 2 Bacteria        | <b>M - Cell wall/membrane/envelope biogenesis</b> | undecaprenyl-phosphate glucose phosphotransferase activity           | wcaJ | GO:0000271,GO:0003674,GO:0003824,GO:0005975,GO:0005976,GO:0006629,GO:0008150,GO:0008152,GO:0008610,GO:0008653,GO:0009058,GO:0009059,GO:0009103,GO:0009243,GO:0009987,GO:0016051,GO:0016740,GO:0016772,GO:0016780,GO:0033692,GO:0034637,GO:0034645,GO:0043170,GO:0044237,GO:0044238,GO:0044249,GO:0044255,GO:0044260,GO:0044262,GO:0044264,GO:0046402,GO:0071704,GO:1901135,GO:1901137,GO:1901576,GO:1903509                                                                              | 2.4.1.187,2.7.8.40 | ko:K05946,ko:K21303 |
| 1301100.<br>HG529227_gene5476 | 4.24e-29  | 109.0 | COG1086@1 root,COG2148@1 root,COG1086@2 Bacteria,COG2148@2 Bacteria,1TP7M@1239 Firmicutes,248WV@186801 Clostridia,36GR6@31979 Clostridiaceae | 186801 Clostridia | <b>M - Cell wall/membrane/envelope biogenesis</b> | Exopolysaccharide biosynthesis polyprenyl glycosylphosphotransferase | -    | -                                                                                                                                                                                                                                                                                                                                                                                                                                                                                        | -                  | -                   |

|                     |           |       |                                    |                          |                                                |                                                                                         |      |   |                                                                   |                   |                     |
|---------------------|-----------|-------|------------------------------------|--------------------------|------------------------------------------------|-----------------------------------------------------------------------------------------|------|---|-------------------------------------------------------------------|-------------------|---------------------|
| 1276756.            |           |       | COG2148@1 root,COG2148@2 Bacteria, |                          | <b>M - Cell</b>                                |                                                                                         |      |   |                                                                   |                   |                     |
| AUEX01000004_gene24 |           |       | 1MV6W@1224 Proteobacteria,         |                          | <b>wall/membrane/envelope biogenesis</b>       | Bacterial sugar transferase                                                             | wcaJ | - |                                                                   | 2.7.8.40          | ko:K21303           |
| 69                  | 5.62e-24  | 97.8  | 2VIY4@28216 Betaproteobacteria,    | 28216 Betaproteobacteria | <b>EG</b>                                      | spore germination                                                                       | ydeD | - |                                                                   | -                 | -                   |
| 59374.Fisuc_0427    | 4.21e-44  | 155.0 | 4ACXV@80864 Comamonadaceae         | 2 Bacteria               | <b>F - Nucleotide transport and metabolism</b> | Catalyzes the phosphorylation of pantothenate (Pan), the first step in CoA biosynthesis | coaX |   | GO:0005575,GO:0005623,GO:0005886,GO:0016020,GO:0044464,GO:0071944 | 2.7.1.33          | ko:K03525           |
| 59374.Fisuc_2914    | 2.43e-132 | 380.0 | COG1521@1 root,COG1521@2 Bacteria  | 2 Bacteria               | <b>GM</b>                                      | ADP-glyceromanno-heptose 6-epimerase activity                                           | uxs  | - |                                                                   | 4.1.1.35,4.2.1.46 | ko:K01710,ko:K08678 |
| 59374.Fisuc_2256    | 3.39e-90  | 272.0 | COG0451@1 root,COG0451@2 Bacteria  | 2 Bacteria               |                                                |                                                                                         |      |   |                                                                   |                   |                     |

**Supplementary Table 5. Antimicrobial activity of Linear HG2** (without disulphide bond on cysteine residues).

| Bacteria strains           | Minimum inhibitory Concentrations MICs ( µg/ml) |       |                         |               |
|----------------------------|-------------------------------------------------|-------|-------------------------|---------------|
|                            | HG2                                             | HG4   | Antimicrobial compounds |               |
|                            |                                                 |       | Polymyxin B sulphate    | Ciprofloxacin |
| <i>P. aeruginosa</i>       | >1024                                           | ≥1024 | 1.95                    | 0.49          |
| <i>Sal. typhimurium</i>    | >1024                                           | 512   | 1.95                    | 0.12          |
| <i>E. coli</i>             | >1024                                           | 512   | 1.95                    | 0.06          |
| <i>EMRA-15</i>             | >1024                                           | 32    | 250                     | >250          |
| <i>S. aureus</i>           | >1024                                           | 32    | 250                     | >250          |
| <i>Ent. faecalis</i>       | >1024                                           | 128   | 31.25                   | 62.5          |
| <i>List. monocytogenes</i> | >1024                                           | 512   | 62.5                    | 62.5          |

**Supplementary Table 6. Cytotoxicity and haemolytic activities of HG2 and HG4 on human cells.** Cytotoxicity is expressed as IC<sub>50</sub> (i.e. the concentration of peptide in µg/ml causing a reduction of 50% of the cell viability). Haemolytic activity is expressed as HC<sub>50</sub> (i.e. the concentration of peptide causing 50% haemolysis). IC<sub>50</sub> and HC<sub>50</sub> are expressed in µg/ml concentrations. Therapeutic Indexes (T.I) corresponding to the fold difference between IC<sub>50</sub> or HC<sub>50</sub> and MIC values (for MRSA USA300) are given in brackets.

| <b>Cell type (human)</b> | <b>HG2 (X MIC)</b>  | <b>HG4 (X MIC)</b>   |
|--------------------------|---------------------|----------------------|
| <b>BEAS-2B</b>           | 120 +/- 25 (X 7.7)  | >1000 (> 32)         |
| <b>HEPG2</b>             | 359 +/- 76 (X 23)   | >1000 (> 32)         |
| <b>IMR-90</b>            | 96 +/- 21 (X 6.1)   | 294 +/- 42 (X 9.4)   |
| <b>Erythrocytes</b>      | 409 +/- 67 (X 26.2) | 458 +/- 101 (X 14.6) |



**Supplementary Table 7. Peptide lipid interaction and insertion measurements:** interaction of peptides, HG2 and HG4 with total MRSA and erythrocyte lipid extracts, and interaction of HG2 and HG4 (at 1  $\mu\text{g/mL}$  final concentration) with pure lipids the initial surface pressure of lipid monolayer. Maximal variation of surface pressure induced by the injection of peptide in lipid monolayer with initial surface pressure of 30 $\pm$ 0.5 mN/m

| <b>Lipids</b>       | <b>HG2</b>                                    |                                   | <b>HG4</b>                                    |                                  |
|---------------------|-----------------------------------------------|-----------------------------------|-----------------------------------------------|----------------------------------|
|                     | Critical pressure of insertion $\pi_c$ (mN/m) | Speed of insertion (mN/ m/10 sec) | Critical pressure of insertion $\pi_c$ (mN/m) | Speed of insertion (mN/m/10 sec) |
| Erythrocyte extract | 35.07                                         | 1.13                              | 30.99                                         | 1.20                             |
| MRSA extract        | 42.59                                         | 3.36                              | 44.18                                         | 1.69                             |
| Cardiolipin         | 41.30                                         | 4.74                              | 46.49                                         | 2.44                             |
| LTA                 | 47.81                                         | 0.80                              | 40.04                                         | 0.39                             |
| LPS                 | 36.03                                         | 0.43                              | 34.08                                         | 0.31                             |
| PC                  | 62.79                                         | 8.58                              | 28.8                                          | 0.50                             |
| PE                  | 39.49                                         | 1.89                              | 33.9                                          | 0.20                             |
| PG                  | 51.19                                         | 3.70                              | 47.55                                         | 2.48                             |

Supplementary Table 8. Differentially Expressed Genes (DEGs) isolated from HG2 treated sample

| S/N | Name                                          | Differential Expression Log2 Ratio | protein_id     | Gene ontology (biological process)                                                                            | Gene ontology (cellular component)                                                                            | Gene ontology (molecular function)                                                                                                                                                                                                                                        | GO ID                                                                              |
|-----|-----------------------------------------------|------------------------------------|----------------|---------------------------------------------------------------------------------------------------------------|---------------------------------------------------------------------------------------------------------------|---------------------------------------------------------------------------------------------------------------------------------------------------------------------------------------------------------------------------------------------------------------------------|------------------------------------------------------------------------------------|
| 1   | farE CDS                                      | -11.30840383                       | WP_001051429.1 |                                                                                                               |                                                                                                               | integral component of membrane [GO:0016021]; plasma membrane [GO:0005886]                                                                                                                                                                                                 | GO:0005886; GO:0016021                                                             |
| 2   | IrgA CDS                                      | -10.01917583                       | WP_001792906.1 | cytolysis [GO:0019835]; programmed cell death [GO:0012501]                                                    | cytolysis [GO:0019835]; programmed cell death [GO:0012501]                                                    | integral component of membrane [GO:0016021]; plasma membrane [GO:0005886]; cytolysis [GO:0019835]; programmed cell death [GO:0012501]                                                                                                                                     | GO:0005886; GO:0012501; GO:0016021; GO:0019835                                     |
| 3   | class I SAM-dependent methyltransferase CDS   | -8.823072126                       | WP_000084829.1 | methylation [GO:0032259]                                                                                      | methylation [GO:0032259]                                                                                      | methyltransferase activity [GO:0008168]; methylation [GO:0032259]                                                                                                                                                                                                         | GO:0008168; GO:0032259                                                             |
| 4   | response regulator transcription factor CDS   | -7.725336378                       | WP_000202389.1 | phosphorelay signal transduction system [GO:0000160]; regulation of transcription, DNA-templated [GO:0006355] | phosphorelay signal transduction system [GO:0000160]; regulation of transcription, DNA-templated [GO:0006355] | DNA binding [GO:0003677]; phosphorelay signal transduction system [GO:0000160]; regulation of transcription, DNA-templated [GO:0006355]                                                                                                                                   | GO:0000160; GO:0003677; GO:0006355                                                 |
| 5   | DUF1450 domain-containing protein CDS         | -7.223249061                       | WP_000798968.1 |                                                                                                               |                                                                                                               |                                                                                                                                                                                                                                                                           |                                                                                    |
| 6   | DNA-directed RNA polymerase subunit omega CDS | -7.1408456                         | WP_000933956.1 | transcription, DNA-templated [GO:0006351]                                                                     | transcription, DNA-templated [GO:0006351]                                                                     | DNA binding [GO:0003677]; DNA-directed 5'-3' RNA polymerase activity [GO:0003899]; transcription, DNA-templated [GO:0006351]                                                                                                                                              | GO:0003677; GO:0003899; GO:0006351                                                 |
| 7   | amino acid permease CDS                       | -6.265042967                       | WP_000389956.1 | amino acid transport [GO:0006865]; transmembrane transport [GO:0055085]                                       | amino acid transport [GO:0006865]; transmembrane transport [GO:0055085]                                       | integral component of membrane [GO:0016021]; amino acid transport [GO:0006865]; transmembrane transport [GO:0055085]                                                                                                                                                      | GO:0006865; GO:0016021; GO:0055085                                                 |
| 8   | penicillin-binding protein CDS                | -5.929129856                       | WP_000184370.1 |                                                                                                               |                                                                                                               | integral component of membrane [GO:0016021]                                                                                                                                                                                                                               | GO:0016021                                                                         |
| 9   | LCP family protein CDS                        | -5.836294579                       | WP_000356975.1 |                                                                                                               |                                                                                                               | integral component of membrane [GO:0016021]; plasma membrane [GO:0005886]                                                                                                                                                                                                 | GO:0005886; GO:0016021                                                             |
| 10  | dephospho-CoA kinase CDS                      | -5.002828038                       | WP_001127167.1 | coenzyme A biosynthetic process [GO:0015937]                                                                  | coenzyme A biosynthetic process [GO:0015937]                                                                  | cytoplasm [GO:0005737]; ATP binding [GO:0005524]; dephospho-CoA kinase activity [GO:0004140]; coenzyme A biosynthetic process [GO:0015937]                                                                                                                                | GO:0004140; GO:0005524; GO:0005737; GO:0015937                                     |
| 11  | NarK/NasA family nitrate transporter CDS      | -4.925642769                       | WP_000278558.1 | nitrate assimilation [GO:0042128]                                                                             | nitrate assimilation [GO:0042128]                                                                             | integral component of membrane [GO:0016021]; plasma membrane [GO:0005886]; transmembrane transporter activity [GO:0022857]; nitrate assimilation [GO:0042128]                                                                                                             | GO:0005886; GO:0016021; GO:0022857; GO:0042128                                     |
| 12  | IrgB CDS                                      | -3.837821059                       | WP_000607067.1 | cytolysis [GO:0019835]; programmed cell death [GO:0012501]                                                    | cytolysis [GO:0019835]; programmed cell death [GO:0012501]                                                    | integral component of membrane [GO:0016021]; plasma membrane [GO:0005886]; cytolysis [GO:0019835]; programmed cell death [GO:0012501]                                                                                                                                     | GO:0005886; GO:0012501; GO:0016021; GO:0019835                                     |
| 13  | amino acid permease CDS                       | -3.813483634                       | WP_000534425.1 |                                                                                                               |                                                                                                               | integral component of membrane [GO:0016021]; transmembrane transporter activity [GO:0022857]                                                                                                                                                                              | GO:0016021; GO:0022857                                                             |
| 14  | (S)-acetoin forming diacetyl reductase CDS    | -3.795748682                       | WP_000183771.1 | acetoin catabolic process [GO:0045150]                                                                        | acetoin catabolic process [GO:0045150]                                                                        | diacetyl reductase ((S)-acetoin forming) activity [GO:0052588]; acetoin catabolic process [GO:0045150]                                                                                                                                                                    | GO:0045150; GO:0052588                                                             |
| 15  | DUF3387 domain-containing protein CDS         | -3.780915861                       | WP_001549961.1 |                                                                                                               |                                                                                                               |                                                                                                                                                                                                                                                                           |                                                                                    |
| 16  | nreC CDS                                      | -3.760017955                       | WP_000706315.1 | phosphorelay signal transduction system [GO:0000160]; regulation of transcription, DNA-templated [GO:0006355] | phosphorelay signal transduction system [GO:0000160]; regulation of transcription, DNA-templated [GO:0006355] | cytoplasm [GO:0005737]; DNA binding [GO:0003677]; phosphorelay signal transduction system [GO:0000160]; regulation of transcription, DNA-templated [GO:0006355]                                                                                                           | GO:0000160; GO:0003677; GO:0005737; GO:0006355                                     |
| 17  | nreB CDS                                      | -3.70010162                        | WP_000606546.1 |                                                                                                               |                                                                                                               | cytoplasm [GO:0005737]; integral component of membrane [GO:0016021]; 4 iron, 4 sulfur cluster binding [GO:0051539]; ATP binding [GO:0005524]; iron ion binding [GO:0005506]; phosphorelay sensor kinase activity [GO:0000155]; protein dimerization activity [GO:0046983] | GO:0000155; GO:0005506; GO:0005524; GO:0005737; GO:0016021; GO:0046983; GO:0051539 |
| 18  | narI CDS                                      | -3.595212842                       | WP_000934151.1 | nitrate assimilation [GO:0042128]                                                                             | nitrate assimilation [GO:0042128]                                                                             | integral component of membrane [GO:0016021]; nitrate reductase complex [GO:0009325]; plasma membrane [GO:0005886]; metal ion binding [GO:0046872]; nitrate reductase activity [GO:0008940]; nitrate assimilation [GO:0042128]                                             | GO:0005886; GO:0008940; GO:0009325; GO:0016021; GO:0042128; GO:0046872             |
| 19  | sdaAB CDS                                     | -3.546549727                       | WP_001140234.1 | gluconeogenesis [GO:0006094]                                                                                  | gluconeogenesis [GO:0006094]                                                                                  | 4 iron, 4 sulfur cluster binding [GO:0051539]; L-serine ammonia-lyase activity [GO:0003941]; metal ion binding [GO:0046872]; gluconeogenesis [GO:0006094]                                                                                                                 | GO:0003941; GO:0006094; GO:0046872; GO:0051539                                     |

Supplementary Table 8. Differentially Expressed Genes (DEGs) isolated from HG2 treated sample

|    |                                                      |              |                |                                                                                             |                                                                                             |                                                                                                                                                                                                                                    |                                                                        |
|----|------------------------------------------------------|--------------|----------------|---------------------------------------------------------------------------------------------|---------------------------------------------------------------------------------------------|------------------------------------------------------------------------------------------------------------------------------------------------------------------------------------------------------------------------------------|------------------------------------------------------------------------|
| 20 | nirD CDS                                             | -3.502786463 | WP_000448222.1 | nitrate assimilation [GO:0042128]                                                           | nitrate assimilation [GO:0042128]                                                           | 2 iron, 2 sulfur cluster binding [GO:0051537]; metal ion binding [GO:0046872]; nitrite reductase [NAD(P)H] activity [GO:0008942]; nitrate assimilation [GO:0042128]                                                                | GO:0008942; GO:0042128; GO:0046872; GO:0051537                         |
| 21 | amino acid permease CDS                              | -3.48836976  | WP_000818525.1 | transmembrane transport [GO:0055085]                                                        | transmembrane transport [GO:0055085]                                                        | integral component of membrane [GO:0016021]; transmembrane transport [GO:0055085]                                                                                                                                                  | GO:0016021; GO:0055085                                                 |
| 22 | msaA CDS                                             | -3.457895695 | WP_000269923.1 |                                                                                             |                                                                                             |                                                                                                                                                                                                                                    |                                                                        |
| 23 | narJ CDS                                             | -3.450293315 | WP_000606768.1 | chaperone-mediated protein complex assembly [GO:0051131]; nitrate assimilation [GO:0042128] | chaperone-mediated protein complex assembly [GO:0051131]; nitrate assimilation [GO:0042128] | unfolded protein binding [GO:0051082]; chaperone-mediated protein complex assembly [GO:0051131]; nitrate assimilation [GO:0042128]                                                                                                 | GO:0042128; GO:0051082; GO:0051131                                     |
| 24 | heavy-metal-associated domain-containing protein CDS | -3.429524643 | WP_000581792.1 |                                                                                             |                                                                                             | metal ion binding [GO:0046872]                                                                                                                                                                                                     | GO:0046872                                                             |
| 25 | amino acid permease CDS                              | -3.306044368 | WP_000101538.1 | transmembrane transport [GO:0055085]                                                        | transmembrane transport [GO:0055085]                                                        | integral component of membrane [GO:0016021]; transmembrane transport [GO:0055085]                                                                                                                                                  | GO:0016021; GO:0055085                                                 |
| 26 | urease subunit gamma CDS                             | -3.287095778 | WP_000545928.1 | urea catabolic process [GO:0043419]                                                         | urea catabolic process [GO:0043419]                                                         | cytoplasm [GO:0005737]; nickel cation binding [GO:0016151]; urease activity [GO:0009039]; urea catabolic process [GO:0043419]                                                                                                      | GO:0005737; GO:0009039; GO:0016151; GO:0043419                         |
| 27 | Veg family protein CDS                               | -3.258565466 | WP_001126664.1 | regulation of transcription, DNA-templated [GO:0006355]                                     | regulation of transcription, DNA-templated [GO:0006355]                                     | regulation of transcription, DNA-templated [GO:0006355]                                                                                                                                                                            | GO:0006355                                                             |
| 28 | nreA CDS                                             | -3.153049033 | WP_000186933.1 |                                                                                             |                                                                                             |                                                                                                                                                                                                                                    |                                                                        |
| 29 | narH CDS                                             | -3.114843431 | WP_000692645.1 | nitrate metabolic process [GO:0042126]                                                      | nitrate metabolic process [GO:0042126]                                                      | nitrate reductase complex [GO:0009325]; nitrate reductase activity [GO:0008940]; nitrate metabolic process [GO:0042126]                                                                                                            | GO:0008940; GO:0009325; GO:0042126                                     |
| 30 | formate/nitrite transporter family protein CDS       | -3.072371321 | WP_000572040.1 |                                                                                             |                                                                                             | integral component of membrane [GO:0016021]; transmembrane transporter activity [GO:0022857]                                                                                                                                       | GO:0016021; GO:0022857                                                 |
| 31 | cold-shock protein CDS                               | -2.983735897 | WP_001059082.1 |                                                                                             |                                                                                             | cytoplasm [GO:0005737]; nucleic acid binding [GO:0003676]                                                                                                                                                                          | GO:0003676; GO:0005737                                                 |
| 32 | Nramp family divalent metal transporter CDS          | -2.948086848 | WP_001060842.1 |                                                                                             |                                                                                             | integral component of membrane [GO:0016021]; plasma membrane [GO:0005886]; metal ion binding [GO:0046872]; metal ion transmembrane transporter activity [GO:0046873]; symporter activity [GO:0015293]                              | GO:0005886; GO:0015293; GO:0016021; GO:0046872; GO:0046873             |
| 33 | cold-shock protein CDS                               | -2.927664076 | WP_001059079.1 |                                                                                             |                                                                                             | cytoplasm [GO:0005737]; DNA binding [GO:0003677]                                                                                                                                                                                   | GO:0003677; GO:0005737                                                 |
| 34 | putP CDS                                             | -2.903750884 | WP_000957015.1 | proline transport [GO:0015824]                                                              | proline transport [GO:0015824]                                                              | integral component of membrane [GO:0016021]; plasma membrane [GO:0005886]; proline:sodium symporter activity [GO:0005298]; sodium ion binding [GO:0031402]; proline transport [GO:0015824]                                         | GO:0005298; GO:0005886; GO:0015824; GO:0016021; GO:0031402             |
| 35 | L-lactate permease CDS                               | -2.835720952 | WP_000960852.1 |                                                                                             |                                                                                             | integral component of plasma membrane [GO:0005887]; lactate transmembrane transporter activity [GO:0015129]                                                                                                                        | GO:0005887; GO:0015129                                                 |
| 36 | srtA CDS                                             | -2.816104526 | WP_000759361.1 |                                                                                             |                                                                                             | integral component of membrane [GO:0016021]; plasma membrane [GO:0005886]; cysteine-type peptidase activity [GO:0008234]; metal ion binding [GO:0046872]                                                                           | GO:0005886; GO:0008234; GO:0016021; GO:0046872                         |
| 37 | cytochrome ubiquinol oxidase subunit I CDS           | -2.792526687 | WP_000381849.1 | aerobic electron transport chain [GO:0019646]                                               | aerobic electron transport chain [GO:0019646]                                               | cytochrome complex [GO:0070069]; integral component of membrane [GO:0016021]; plasma membrane [GO:0005886]; electron transfer activity [GO:0009055]; metal ion binding [GO:0046872]; aerobic electron transport chain [GO:0019646] | GO:0005886; GO:0009055; GO:0016021; GO:0019646; GO:0046872; GO:0070069 |
| 38 | kinase-associated lipoprotein B CDS                  | -2.762945907 | WP_000781156.1 |                                                                                             |                                                                                             | kinase activity [GO:0016301]                                                                                                                                                                                                       | GO:0016301                                                             |
| 39 | transposase CDS                                      | -2.75747142  | WP_000159787.1 | transposition, DNA-mediated [GO:0006313]                                                    | transposition, DNA-mediated [GO:0006313]                                                    | DNA binding [GO:0003677]; transposase activity [GO:0004803]; transposition, DNA-mediated [GO:0006313]                                                                                                                              | GO:0003677; GO:0004803; GO:0006313                                     |
| 40 | IS1182 family transposase CDS                        | -2.706396874 |                |                                                                                             |                                                                                             |                                                                                                                                                                                                                                    |                                                                        |

Supplementary Table 8. Differentially Expressed Genes (DEGs) isolated from HG2 treated sample

|    |                                                         |              |                |                                                                                                  |                                                                                                  |                                                                                                                                                                                                                                                                                   |                                                                                    |
|----|---------------------------------------------------------|--------------|----------------|--------------------------------------------------------------------------------------------------|--------------------------------------------------------------------------------------------------|-----------------------------------------------------------------------------------------------------------------------------------------------------------------------------------------------------------------------------------------------------------------------------------|------------------------------------------------------------------------------------|
| 41 | PTS fructose transporter subunit IIC CDS                | -2.700733556 | WP_000353634.1 | phosphoenolpyruvate-dependent sugar phosphotransferase system [GO:0009401]                       | phosphoenolpyruvate-dependent sugar phosphotransferase system [GO:0009401]                       | integral component of membrane [GO:0016021]; plasma membrane [GO:0005886]; protein-N(Pi)-phosphohistidine-sugar phosphotransferase activity [GO:0008982]; phosphoenolpyruvate-dependent sugar phosphotransferase system [GO:0009401]                                              | GO:0005886; GO:0008982; GO:0009401; GO:0016021                                     |
| 42 | holA CDS                                                | -2.670769457 | WP_001282562.1 | DNA replication [GO:0006260]                                                                     | DNA replication [GO:0006260]                                                                     | DNA polymerase III complex [GO:0009360]; DNA binding [GO:0003677]; DNA-directed DNA polymerase activity [GO:0003887]; DNA replication [GO:0006260]                                                                                                                                | GO:0003677; GO:0003887; GO:0006260; GO:0009360                                     |
| 43 | csor CDS                                                | -2.66861595  | WP_000138932.1 | regulation of transcription, DNA-templated [GO:0006355]                                          | regulation of transcription, DNA-templated [GO:0006355]                                          | DNA binding [GO:0003677]; metal ion binding [GO:0046872]; regulation of transcription, DNA-templated [GO:0006355]                                                                                                                                                                 | GO:0003677; GO:0006355; GO:0046872                                                 |
| 44 | DASS family sodium-coupled anion symporter CDS          | -2.644967961 | WP_001288049.1 |                                                                                                  |                                                                                                  | integral component of membrane [GO:0016021]; transmembrane transporter activity [GO:0022857]                                                                                                                                                                                      | GO:0016021; GO:0022857                                                             |
| 45 | DUF2871 domain-containing protein CDS                   | -2.641271777 | WP_001253464.1 |                                                                                                  |                                                                                                  | integral component of membrane [GO:0016021]                                                                                                                                                                                                                                       | GO:0016021                                                                         |
| 46 | mreC CDS                                                | -2.640164443 | WP_000911041.1 | regulation of cell shape [GO:0008360]                                                            | regulation of cell shape [GO:0008360]                                                            | regulation of cell shape [GO:0008360]                                                                                                                                                                                                                                             | GO:0008360                                                                         |
| 47 | ABC transporter substrate-binding protein CDS           | -2.594557887 | WP_000517187.1 | transmembrane transport [GO:0055085]                                                             | transmembrane transport [GO:0055085]                                                             | ATP-binding cassette (ABC) transporter complex [GO:0043190]; transmembrane transport [GO:0055085]                                                                                                                                                                                 | GO:0043190; GO:0055085                                                             |
| 48 | cobA CDS                                                | -2.548744873 | WP_000109968.1 | methylation [GO:0032259]; siroheme biosynthetic process [GO:0019354]                             | methylation [GO:0032259]; siroheme biosynthetic process [GO:0019354]                             | uroporphyrin-III C-methyltransferase activity [GO:0004851]; methylation [GO:0032259]; siroheme biosynthetic process [GO:0019354]                                                                                                                                                  | GO:0004851; GO:0019354; GO:0032259                                                 |
| 49 | biotin-dependent carboxyltransferase family protein CDS | -2.543868197 | WP_000022323.1 |                                                                                                  |                                                                                                  | ATP binding [GO:0005524]; hydrolase activity [GO:0016787]                                                                                                                                                                                                                         | GO:0005524; GO:0016787                                                             |
| 50 | nitrate reductase subunit alpha CDS                     | -2.528694922 | WP_000514391.1 | nitrate metabolic process [GO:0042126]                                                           | nitrate metabolic process [GO:0042126]                                                           | nitrate reductase complex [GO:0009325]; plasma membrane [GO:0005886]; 4 iron, 4 sulfur cluster binding [GO:0051539]; metal ion binding [GO:0046872]; molybdopterin cofactor binding [GO:0043546]; nitrate reductase activity [GO:0008940]; nitrate metabolic process [GO:0042126] | GO:0005886; GO:0008940; GO:0009325; GO:0042126; GO:0043546; GO:0046872; GO:0051539 |
| 51 | traP CDS                                                | -2.522312924 | WP_000737976.1 | pathogenesis [GO:0009405]                                                                        | pathogenesis [GO:0009405]                                                                        | membrane [GO:0016020]; pathogenesis [GO:0009405]                                                                                                                                                                                                                                  | GO:0009405; GO:0016020                                                             |
| 52 | NAD(P)/FAD-dependent oxidoreductase CDS                 | -2.483583096 | WP_001118736.1 | nitrate assimilation [GO:0042128]                                                                | nitrate assimilation [GO:0042128]                                                                | 4 iron, 4 sulfur cluster binding [GO:0051539]; flavin adenine dinucleotide binding [GO:0050660]; heme binding [GO:0020037]; metal ion binding [GO:0046872]; NADP binding [GO:0050661]; nitrite reductase [NAD(P)H] activity [GO:0008942]; nitrate assimilation [GO:0042128]       | GO:0008942; GO:0020037; GO:0042128; GO:0046872; GO:0050660; GO:0050661; GO:0051539 |
| 53 | exonuclease SbcCD subunit D CDS                         | -2.462862144 | WP_000238227.1 |                                                                                                  |                                                                                                  | hydrolase activity [GO:0016787]                                                                                                                                                                                                                                                   | GO:0016787                                                                         |
| 54 | upp CDS                                                 | -2.448346285 | WP_000048712.1 | nucleoside metabolic process [GO:0009116]; UMP salvage [GO:0044206]; uracil salvage [GO:0006223] | nucleoside metabolic process [GO:0009116]; UMP salvage [GO:0044206]; uracil salvage [GO:0006223] | GTP binding [GO:0005525]; magnesium ion binding [GO:0000287]; uracil phosphoribosyltransferase activity [GO:0004845]; nucleoside metabolic process [GO:0009116]; UMP salvage [GO:0044206]; uracil salvage [GO:0006223]                                                            | GO:0000287; GO:0004845; GO:0005525; GO:0006223; GO:0009116; GO:0044206             |
| 55 | peptide MFS transporter CDS                             | -2.398035159 | WP_000193752.1 | oligopeptide transport [GO:0006857]                                                              | oligopeptide transport [GO:0006857]                                                              | integral component of membrane [GO:0016021]; plasma membrane [GO:0005886]; peptide transmembrane transporter activity [GO:1904680]; oligopeptide transport [GO:0006857]                                                                                                           | GO:0005886; GO:0006857; GO:0016021; GO:1904680                                     |
| 56 | response regulator transcription factor CDS             | -2.380658046 |                |                                                                                                  |                                                                                                  |                                                                                                                                                                                                                                                                                   |                                                                                    |
| 57 | LacI family DNA-binding transcriptional regulator CDS   | -2.37833836  | WP_000256338.1 | regulation of transcription, DNA-templated [GO:0006355]                                          | regulation of transcription, DNA-templated [GO:0006355]                                          | DNA binding [GO:0003677]; regulation of transcription, DNA-templated [GO:0006355]                                                                                                                                                                                                 | GO:0003677; GO:0006355                                                             |
| 58 | membrane protein CDS                                    | -2.356458567 | WP_001024035.1 |                                                                                                  |                                                                                                  | integral component of membrane [GO:0016021]                                                                                                                                                                                                                                       | GO:0016021                                                                         |
| 59 | hypothetical protein CDS                                | -2.352040652 | WP_001788599.1 |                                                                                                  |                                                                                                  |                                                                                                                                                                                                                                                                                   |                                                                                    |
| 60 | ytxJ CDS                                                | -2.323996491 | WP_000985617.1 |                                                                                                  |                                                                                                  |                                                                                                                                                                                                                                                                                   |                                                                                    |

Supplementary Table 8. Differentially Expressed Genes (DEGs) isolated from HG2 treated sample

|    |                                                                           |              |                |                                                                                                                     |                                                                                                                     |                                                                                                                                                                                                                                                                              |                                                                        |
|----|---------------------------------------------------------------------------|--------------|----------------|---------------------------------------------------------------------------------------------------------------------|---------------------------------------------------------------------------------------------------------------------|------------------------------------------------------------------------------------------------------------------------------------------------------------------------------------------------------------------------------------------------------------------------------|------------------------------------------------------------------------|
| 61 | quinone-dependent dihydroorotate dehydrogenase CDS                        | -2.314752783 | WP_000277415.1 | 'de novo' pyrimidine nucleobase biosynthetic process [GO:0006207]; 'de novo' UMP biosynthetic process [GO:0044205]  | 'de novo' pyrimidine nucleobase biosynthetic process [GO:0006207]; 'de novo' UMP biosynthetic process [GO:0044205]  | cytoplasm [GO:0005737]; plasma membrane [GO:0005886]; dihydroorotate dehydrogenase activity [GO:0004152]; orotate reductase (NADH) activity [GO:0004589]; 'de novo' pyrimidine nucleobase biosynthetic process [GO:0006207]; 'de novo' UMP biosynthetic process [GO:0044205] | GO:0004152; GO:0004589; GO:0005737; GO:0005886; GO:0006207; GO:0044205 |
| 62 | metal-dependent transcriptional regulator CDS                             | -2.288350675 | WP_000954654.1 |                                                                                                                     |                                                                                                                     | DNA binding [GO:0003677]; DNA-binding transcription factor activity [GO:0003700]; protein dimerization activity [GO:0046983]; transition metal ion binding [GO:0046914]                                                                                                      | GO:0003677; GO:0003700; GO:0046914; GO:0046983                         |
| 63 | ABC transporter permease CDS                                              | -2.286282403 | WP_000593417.1 | nickel cation transport [GO:0015675]; transmembrane transport [GO:0055085]                                          | nickel cation transport [GO:0015675]; transmembrane transport [GO:0055085]                                          | integral component of membrane [GO:0016021]; plasma membrane [GO:0005886]; nickel cation transport [GO:0015675]; transmembrane transport [GO:0055085]                                                                                                                        | GO:0005886; GO:0015675; GO:0016021; GO:0055085                         |
| 64 | hypothetical protein CDS                                                  | -2.276216245 | WP_000828354.1 |                                                                                                                     |                                                                                                                     |                                                                                                                                                                                                                                                                              |                                                                        |
| 65 | APC family permease CDS                                                   | -2.274749157 | WP_000483049.1 |                                                                                                                     |                                                                                                                     | integral component of membrane [GO:0016021]; transmembrane transporter activity [GO:0022857]                                                                                                                                                                                 | GO:0016021; GO:0022857                                                 |
| 66 | hypothetical protein CDS                                                  | -2.271644549 | WP_001790562.1 |                                                                                                                     |                                                                                                                     |                                                                                                                                                                                                                                                                              |                                                                        |
| 67 | cytochrome d ubiquinol oxidase subunit II CDS                             | -2.249950309 | WP_000638456.1 |                                                                                                                     |                                                                                                                     | integral component of membrane [GO:0016021]; plasma membrane [GO:0005886]; oxidoreductase activity [GO:0016491]                                                                                                                                                              | GO:0005886; GO:0016021; GO:0016491                                     |
| 68 | hypothetical protein CDS                                                  | -2.248749647 | WP_001251935.1 |                                                                                                                     |                                                                                                                     |                                                                                                                                                                                                                                                                              |                                                                        |
| 69 | yfhO CDS                                                                  | -2.248677232 | WP_000915229.1 |                                                                                                                     |                                                                                                                     | integral component of membrane [GO:0016021]; transferase activity [GO:0016740]                                                                                                                                                                                               | GO:0016021; GO:0016740                                                 |
| 70 | 4-oxalocrotonate tautomerase CDS                                          | -2.246540446 | WP_001123276.1 | cellular aromatic compound metabolic process [GO:0006725]                                                           | cellular aromatic compound metabolic process [GO:0006725]                                                           | isomerase activity [GO:0016853]; cellular aromatic compound metabolic process [GO:0006725]                                                                                                                                                                                   | GO:0006725; GO:0016853                                                 |
| 71 | YwpF-like family protein CDS                                              | -2.242105648 | WP_000846746.1 |                                                                                                                     |                                                                                                                     |                                                                                                                                                                                                                                                                              |                                                                        |
| 72 | PTS-dependent dihydroxyacetone kinase phosphotransferase subunit DhaM CDS | -2.238042017 | WP_001124167.1 | glycerol catabolic process [GO:0019563]; phosphoenolpyruvate-dependent sugar phosphotransferase system [GO:0009401] | glycerol catabolic process [GO:0019563]; phosphoenolpyruvate-dependent sugar phosphotransferase system [GO:0009401] | integral component of membrane [GO:0016021]; phosphoenolpyruvate-glycerone phosphotransferase activity [GO:0047324]; glycerol catabolic process [GO:0019563]; phosphoenolpyruvate-dependent sugar phosphotransferase system [GO:0009401]                                     | GO:0009401; GO:0016021; GO:0019563; GO:0047324                         |
| 73 | DUF420 domain-containing protein CDS                                      | -2.227081854 | WP_000538766.1 |                                                                                                                     |                                                                                                                     | integral component of membrane [GO:0016021]                                                                                                                                                                                                                                  | GO:0016021                                                             |
| 74 | S1 RNA-binding domain-containing protein CDS                              | -2.218519839 | WP_001067294.1 |                                                                                                                     |                                                                                                                     | nucleic acid binding [GO:0003676]                                                                                                                                                                                                                                            | GO:0003676                                                             |
| 75 | YjzD family protein CDS                                                   | -2.186535552 | WP_000682089.1 |                                                                                                                     |                                                                                                                     | integral component of membrane [GO:0016021]                                                                                                                                                                                                                                  | GO:0016021                                                             |
| 76 | hypothetical protein CDS                                                  | -2.17857337  | WP_001790128.1 |                                                                                                                     |                                                                                                                     |                                                                                                                                                                                                                                                                              |                                                                        |
| 77 | heme A synthase CDS                                                       | -2.163798773 | WP_000467123.1 | heme A biosynthetic process [GO:0006784]                                                                            | heme A biosynthetic process [GO:0006784]                                                                            | integral component of membrane [GO:0016021]; plasma membrane [GO:0005886]; oxidoreductase activity, acting on the CH-CH group of donors [GO:0016627]; heme A biosynthetic process [GO:0006784]                                                                               | GO:0005886; GO:0006784; GO:0016021; GO:0016627                         |
| 78 | dlfD CDS                                                                  | -2.117738355 | WP_000769417.1 | lipoteichoic acid biosynthetic process [GO:0070395]                                                                 | lipoteichoic acid biosynthetic process [GO:0070395]                                                                 | integral component of membrane [GO:0016021]; plasma membrane [GO:0005886]; lipoteichoic acid biosynthetic process [GO:0070395]                                                                                                                                               | GO:0005886; GO:0016021; GO:0070395                                     |
| 79 | protoheme IX farnesyltransferase CDS                                      | -2.116667352 | WP_000031401.1 | heme O biosynthetic process [GO:0048034]                                                                            | heme O biosynthetic process [GO:0048034]                                                                            | integral component of membrane [GO:0016021]; plasma membrane [GO:0005886]; protoheme IX farnesyltransferase activity [GO:0008495]; heme O biosynthetic process [GO:0048034]                                                                                                  | GO:0005886; GO:0008495; GO:0016021; GO:0048034                         |
| 80 | GGDEF domain-containing protein CDS                                       | -2.110446368 | WP_000460983.1 | cell wall organization [GO:0071555]                                                                                 | cell wall organization [GO:0071555]                                                                                 | integral component of membrane [GO:0016021]; plasma membrane [GO:0005886]; phosphorelay sensor kinase activity [GO:0000155]; cell wall organization [GO:0071555]                                                                                                             | GO:0000155; GO:0005886; GO:0016021; GO:0071555                         |
| 81 | hypothetical protein CDS                                                  | -2.094059913 | WP_000110603.1 |                                                                                                                     |                                                                                                                     |                                                                                                                                                                                                                                                                              |                                                                        |
| 82 | hypothetical protein CDS                                                  | -2.090938764 | WP_000267034.1 |                                                                                                                     |                                                                                                                     | integral component of membrane [GO:0016021]                                                                                                                                                                                                                                  | GO:0016021                                                             |
| 83 | hypothetical protein CDS                                                  | -2.06964456  | WP_001789909.1 |                                                                                                                     |                                                                                                                     |                                                                                                                                                                                                                                                                              |                                                                        |

Supplementary Table 8. Differentially Expressed Genes (DEGs) isolated from HG2 treated sample

|     |                                                           |              |                |                                                                                                               |                                                                                                               |                                                                                                                                                                                                                                                                                                                                                          |                                                                                    |
|-----|-----------------------------------------------------------|--------------|----------------|---------------------------------------------------------------------------------------------------------------|---------------------------------------------------------------------------------------------------------------|----------------------------------------------------------------------------------------------------------------------------------------------------------------------------------------------------------------------------------------------------------------------------------------------------------------------------------------------------------|------------------------------------------------------------------------------------|
| 84  | BCCT family transporter CDS                               | -2.040946873 | WP_000792345.1 | nitrogen compound transport [GO:0071705]                                                                      | nitrogen compound transport [GO:0071705]                                                                      | integral component of membrane [GO:0016021]; plasma membrane [GO:0005886]; transmembrane transporter activity [GO:0022857]; nitrogen compound transport [GO:0071705]                                                                                                                                                                                     | GO:0005886; GO:0016021; GO:0022857; GO:0071705                                     |
| 85  | spxA CDS                                                  | -2.034624093 | WP_000258003.1 | negative regulation of transcription, DNA-templated [GO:0045892]                                              | negative regulation of transcription, DNA-templated [GO:0045892]                                              | cytoplasm [GO:0005737]; negative regulation of transcription, DNA-templated [GO:0045892]                                                                                                                                                                                                                                                                 | GO:0005737; GO:0045892                                                             |
| 86  | 50S ribosomal protein L28 CDS                             | -2.032699189 | WP_000517908.1 | translation [GO:0006412]                                                                                      | translation [GO:0006412]                                                                                      | ribosome [GO:0005840]; structural constituent of ribosome [GO:0003735]; translation [GO:0006412]                                                                                                                                                                                                                                                         | GO:0003735; GO:0005840; GO:0006412                                                 |
| 87  | qoxA CDS                                                  | -2.025483708 | WP_000032836.1 |                                                                                                               |                                                                                                               | integral component of membrane [GO:0016021]; plasma membrane [GO:0005886]; respirasome [GO:0070469]; copper ion binding [GO:0005507]; cytochrome bo3 ubiquinol oxidase activity [GO:0009486]; cytochrome-c oxidase activity [GO:0004129]; oxidoreductase activity, acting on diphenols and related substances as donors, oxygen as acceptor [GO:0016682] | GO:0004129; GO:0005507; GO:0005886; GO:0009486; GO:0016021; GO:0016682; GO:0070469 |
| 88  | MFS transporter CDS                                       | -2.022734292 | WP_000381270.1 |                                                                                                               |                                                                                                               | integral component of membrane [GO:0016021]; plasma membrane [GO:0005886]; transmembrane transporter activity [GO:0022857]                                                                                                                                                                                                                               | GO:0005886; GO:0016021; GO:0022857                                                 |
| 89  | sterile alpha motif-like domain-containing protein CDS    | -2.007836019 | WP_000011687.1 |                                                                                                               |                                                                                                               |                                                                                                                                                                                                                                                                                                                                                          |                                                                                    |
| 90  | DUF368 domain-containing protein CDS                      | -2.002752489 | WP_001183858.1 |                                                                                                               |                                                                                                               | integral component of membrane [GO:0016021]                                                                                                                                                                                                                                                                                                              | GO:0016021                                                                         |
| 91  | organic hydroperoxide resistance protein CDS              | -2.001810129 | WP_000974460.1 | response to oxidative stress [GO:0006979]                                                                     | response to oxidative stress [GO:0006979]                                                                     | response to oxidative stress [GO:0006979]                                                                                                                                                                                                                                                                                                                | GO:0006979                                                                         |
| 92  | pfkA CDS                                                  | 2.002458277  | WP_000717561.1 | fructose 6-phosphate metabolic process [GO:0006002]                                                           | fructose 6-phosphate metabolic process [GO:0006002]                                                           | cytoplasm [GO:0005737]; 6-phosphofructokinase activity [GO:0003872]; ATP binding [GO:0005524]; metal ion binding [GO:0046872]; fructose 6-phosphate metabolic process [GO:0006002]                                                                                                                                                                       | GO:0003872; GO:0005524; GO:0005737; GO:0006002; GO:0046872                         |
| 93  | sufD CDS                                                  | 2.054635221  | WP_000205572.1 | iron-sulfur cluster assembly [GO:0016226]                                                                     | iron-sulfur cluster assembly [GO:0016226]                                                                     | iron-sulfur cluster assembly [GO:0016226]                                                                                                                                                                                                                                                                                                                | GO:0016226                                                                         |
| 94  | rpmD CDS                                                  | 2.059963118  | WP_001096577.1 | translation [GO:0006412]                                                                                      | translation [GO:0006412]                                                                                      | large ribosomal subunit [GO:0015934]; structural constituent of ribosome [GO:0003735]; translation [GO:0006412]                                                                                                                                                                                                                                          | GO:0003735; GO:0006412; GO:0015934                                                 |
| 95  | ABC transporter permease CDS                              | 2.113214525  | WP_000876318.1 |                                                                                                               |                                                                                                               | integral component of membrane [GO:0016021]; plasma membrane [GO:0005886]; transmembrane transporter activity [GO:0022857]                                                                                                                                                                                                                               | GO:0005886; GO:0016021; GO:0022857                                                 |
| 96  | guaC CDS                                                  | 2.132165781  | WP_000688126.1 | purine nucleotide metabolic process [GO:0006163]                                                              | purine nucleotide metabolic process [GO:0006163]                                                              | GMP reductase complex [GO:1902560]; GMP reductase activity [GO:0003920]; purine nucleotide metabolic process [GO:0006163]                                                                                                                                                                                                                                | GO:0003920; GO:0006163; GO:1902560                                                 |
| 97  | argininosuccinate synthase CDS                            | 2.144738598  | WP_000660045.1 | arginine biosynthetic process [GO:0006526]                                                                    | arginine biosynthetic process [GO:0006526]                                                                    | cytoplasm [GO:0005737]; argininosuccinate synthase activity [GO:0004055]; ATP binding [GO:0005524]; arginine biosynthetic process [GO:0006526]                                                                                                                                                                                                           | GO:0004055; GO:0005524; GO:0005737; GO:0006526                                     |
| 98  | PLP-dependent aminotransferase family protein CDS         | 2.171846235  | WP_000799248.1 | biosynthetic process [GO:0009058]                                                                             | biosynthetic process [GO:0009058]                                                                             | DNA-binding transcription factor activity [GO:0003700]; pyridoxal phosphate binding [GO:0030170]; transaminase activity [GO:0008483]; biosynthetic process [GO:0009058]                                                                                                                                                                                  | GO:0003700; GO:0008483; GO:0009058; GO:0030170                                     |
| 99  | pdxS CDS                                                  | 2.17445988   | WP_000034728.1 | pyridoxal phosphate biosynthetic process [GO:0042823]                                                         | pyridoxal phosphate biosynthetic process [GO:0042823]                                                         | pyridoxal 5'-phosphate synthase (glutamine hydrolysing) activity [GO:0036381]; pyridoxal phosphate biosynthetic process [GO:0042823]                                                                                                                                                                                                                     | GO:0036381; GO:0042823                                                             |
| 100 | CDP-glycerol glycerophosphotransferase family protein CDS | 2.269646627  | WP_000595298.1 | teichoic acid biosynthetic process [GO:0019350]                                                               | teichoic acid biosynthetic process [GO:0019350]                                                               | plasma membrane [GO:0005886]; CDP-glycerol glycerophosphotransferase activity [GO:0047355]; teichoic acid biosynthetic process [GO:0019350]                                                                                                                                                                                                              | GO:0005886; GO:0019350; GO:0047355                                                 |
| 101 | vraR CDS                                                  | 2.351645181  | WP_000153530.1 | phosphorelay signal transduction system [GO:0000160]; regulation of transcription, DNA-templated [GO:0006355] | phosphorelay signal transduction system [GO:0000160]; regulation of transcription, DNA-templated [GO:0006355] | DNA binding [GO:0003677]; phosphorelay signal transduction system [GO:0000160]; regulation of transcription, DNA-templated [GO:0006355]                                                                                                                                                                                                                  | GO:0000160; GO:0003677; GO:0006355                                                 |
| 102 | vraD CDS                                                  | 2.459955391  | WP_000154162.1 |                                                                                                               |                                                                                                               | ATP binding [GO:0005524]                                                                                                                                                                                                                                                                                                                                 | GO:0005524                                                                         |
| 103 | ABC transporter substrate-binding protein CDS             | 2.565682289  | WP_001214661.1 |                                                                                                               |                                                                                                               |                                                                                                                                                                                                                                                                                                                                                          |                                                                                    |

Supplementary Table 8. Differentially Expressed Genes (DEGs) isolated from HG2 treated sample

|     |                                                |             |                |                                                                                                                                                  |                                                                                                                                                  |                                                                                                                                                                                                                                                                                                         |                                                                        |
|-----|------------------------------------------------|-------------|----------------|--------------------------------------------------------------------------------------------------------------------------------------------------|--------------------------------------------------------------------------------------------------------------------------------------------------|---------------------------------------------------------------------------------------------------------------------------------------------------------------------------------------------------------------------------------------------------------------------------------------------------------|------------------------------------------------------------------------|
| 104 | helix-turn-helix transcriptional regulator CDS | 2.59028116  | WP_000451438.1 |                                                                                                                                                  |                                                                                                                                                  |                                                                                                                                                                                                                                                                                                         |                                                                        |
| 105 | gluconate permease CDS                         | 2.632164208 | WP_000481425.1 |                                                                                                                                                  |                                                                                                                                                  | integral component of membrane [GO:0016021]; gluconate transmembrane transporter activity [GO:0015128]                                                                                                                                                                                                  | GO:0015128; GO:0016021                                                 |
| 106 | NADH-dependent flavin oxidoreductase CDS       | 2.634772098 | WP_000838037.1 |                                                                                                                                                  |                                                                                                                                                  | FMN binding [GO:0010181]; oxidoreductase activity [GO:0016491]                                                                                                                                                                                                                                          | GO:0010181; GO:0016491                                                 |
| 107 | M42 family metalloproteinase CDS               | 2.636591049 | WP_001076671.1 |                                                                                                                                                  |                                                                                                                                                  | aminopeptidase activity [GO:0004177]; cellulase activity [GO:0008810]; metal ion binding [GO:0046872]                                                                                                                                                                                                   | GO:0004177; GO:0008810; GO:0046872                                     |
| 108 | TerC family protein CDS                        | 2.806246403 | WP_000928413.1 |                                                                                                                                                  |                                                                                                                                                  | integral component of membrane [GO:0016021]; plasma membrane [GO:0005886]                                                                                                                                                                                                                               | GO:0005886; GO:0016021                                                 |
| 109 | sensor histidine kinase CDS                    | 2.858134202 | WP_001017131.1 |                                                                                                                                                  |                                                                                                                                                  | integral component of membrane [GO:0016021]; plasma membrane [GO:0005886]; ATP binding [GO:0005524]; phosphorelay sensor kinase activity [GO:000155]; protein dimerization activity [GO:0046983]                                                                                                        | GO:000155; GO:0005524; GO:0005886; GO:0016021; GO:0046983              |
| 110 | YmfK family protein CDS                        | 2.878188392 | WP_000214890.1 |                                                                                                                                                  |                                                                                                                                                  |                                                                                                                                                                                                                                                                                                         |                                                                        |
| 111 | gntK CDS                                       | 2.886039075 | WP_000876663.1 | D-gluconate metabolic process [GO:0019521]                                                                                                       | D-gluconate metabolic process [GO:0019521]                                                                                                       | ATP binding [GO:0005524]; gluconokinase activity [GO:0046316]; glycerol kinase activity [GO:0004370]; D-gluconate metabolic process [GO:0019521]                                                                                                                                                        | GO:0004370; GO:0005524; GO:0019521; GO:0046316                         |
| 112 | GntR family transcriptional regulator CDS      | 3.29413264  | WP_000990133.1 |                                                                                                                                                  |                                                                                                                                                  | DNA binding [GO:0003677]; DNA-binding transcription factor activity [GO:0003700]; transaminase activity [GO:0008483]                                                                                                                                                                                    | GO:0003677; GO:0003700; GO:0008483                                     |
| 113 | glmS CDS                                       | 3.375138041 | WP_000334465.1 | carbohydrate derivative biosynthetic process [GO:1901137]; carbohydrate metabolic process [GO:0005975]; glutamine metabolic process [GO:0006541] | carbohydrate derivative biosynthetic process [GO:1901137]; carbohydrate metabolic process [GO:0005975]; glutamine metabolic process [GO:0006541] | cytoplasm [GO:0005737]; carbohydrate derivative binding [GO:0097367]; glutamine-fructose-6-phosphate transaminase (isomerizing) activity [GO:0004360]; carbohydrate derivative biosynthetic process [GO:1901137]; carbohydrate metabolic process [GO:0005975]; glutamine metabolic process [GO:0006541] | GO:0004360; GO:0005737; GO:0005975; GO:0006541; GO:0097367; GO:1901137 |
| 114 | fntA CDS                                       | 8.714976044 | WP_000671243.1 | cell wall organization [GO:0071555]; response to antibiotic [GO:0046677]                                                                         | cell wall organization [GO:0071555]; response to antibiotic [GO:0046677]                                                                         | plasma membrane [GO:0005886]; hydrolase activity [GO:0016787]; cell wall organization [GO:0071555]; response to antibiotic [GO:0046677]                                                                                                                                                                 | GO:0005886; GO:0016787; GO:0046677; GO:0071555                         |

**Supplementary Table 9. Frequencies of Top 10 statistically significant Gene Ontology (GO) ID and description in the Differentially expressed genes (DEGs) in the HG2 treatment group**

| <b>GO ID</b>      | <b>Count</b> | <b>Percentage Occurrence in DEGs</b> | <b>Term Descriptions</b>                   |
|-------------------|--------------|--------------------------------------|--------------------------------------------|
| <b>GO:0016021</b> | 42           | 13.5%                                | integral component of membrane             |
| <b>GO:0005886</b> | 28           | 9.0%                                 | plasma membrane                            |
| <b>GO:0046872</b> | 12           | 3.9%                                 | metal ion binding                          |
| <b>GO:0003677</b> | 11           | 3.5%                                 | DNA binding                                |
| <b>GO:0005737</b> | 11           | 3.5%                                 | cytoplasm                                  |
| <b>GO:0005524</b> | 8            | 2.6%                                 | ATP binding                                |
| <b>GO:0022857</b> | 8            | 2.6%                                 | transmembrane transporter activity         |
| <b>GO:0006355</b> | 6            | 1.9%                                 | regulation of transcription, DNA-templated |
| <b>GO:0042128</b> | 5            | 1.6%                                 | nitrate assimilation                       |
| <b>GO:0055085</b> | 5            | 1.6%                                 | transmembrane transport                    |



Supplementary Table 10. Differentially Expressed Genes (DEGs) isolated from HG4 treated sample

| S/N | Name                                                                          | Differential Expression Log2 Ratio | Differential Expression p-value | protein_id     | Gene ontology (biological process)                                                                                                            | Gene ontology (cellular component)                                                                                                            | Gene ontology (molecular function)                                                                                                                                                                                                            | GO ID                                                                  |
|-----|-------------------------------------------------------------------------------|------------------------------------|---------------------------------|----------------|-----------------------------------------------------------------------------------------------------------------------------------------------|-----------------------------------------------------------------------------------------------------------------------------------------------|-----------------------------------------------------------------------------------------------------------------------------------------------------------------------------------------------------------------------------------------------|------------------------------------------------------------------------|
| 1   | methionine adenosyltransferase CDS                                            | -8.938612437                       | 6.79E-52                        | WP_000933822.1 | one-carbon metabolic process [GO:0006730]; S-adenosylmethionine biosynthetic process [GO:0006556]                                             | one-carbon metabolic process [GO:0006730]; S-adenosylmethionine biosynthetic process [GO:0006556]                                             | cytoplasm [GO:0005737]; ATP binding [GO:0005524]; magnesium ion binding [GO:0000287]; methionine adenosyltransferase activity [GO:0004478]; one-carbon metabolic process [GO:0006730]; S-adenosylmethionine biosynthetic process [GO:0006556] | GO:0000287; GO:0004478; GO:0005524; GO:0005737; GO:0006556; GO:0006730 |
| 2   | hypothetical protein CDS                                                      | -4.061000848                       | 1.49E-05                        | WP_000184341.1 |                                                                                                                                               |                                                                                                                                               |                                                                                                                                                                                                                                               |                                                                        |
| 3   | hypothetical protein CDS                                                      | -3.959693763                       | 4.82E-05                        | WP_000695365.1 |                                                                                                                                               |                                                                                                                                               |                                                                                                                                                                                                                                               |                                                                        |
| 4   | hypothetical protein CDS                                                      | -3.624370342                       | 6.67E-06                        | WP_001790530.1 |                                                                                                                                               |                                                                                                                                               |                                                                                                                                                                                                                                               |                                                                        |
| 5   | amino acid ABC transporter ATP-binding protein CDS                            | -3.574693876                       | 1.69E-11                        | WP_000590809.1 |                                                                                                                                               |                                                                                                                                               | ABC-type amino acid transporter activity [GO:0015424]; ATP binding [GO:0005524]; ATPase-coupled transmembrane transporter activity [GO:0042626]                                                                                               | GO:0005524; GO:0015424; GO:0042626                                     |
| 6   | ABC transporter permease subunit CDS                                          | -3.499145706                       | 2.27E-11                        | WP_000649907.1 | amino acid transport [GO:0006865]; nickel cation transport [GO:0015675]                                                                       | amino acid transport [GO:0006865]; nickel cation transport [GO:0015675]                                                                       | ATP-binding cassette (ABC) transporter complex [GO:0043190]; transmembrane transporter activity [GO:0022857]; amino acid transport [GO:0006865]; nickel cation transport [GO:0015675]                                                         | GO:0006865; GO:0015675; GO:0022857; GO:0043190                         |
| 7   | ilvA CDS                                                                      | -3.316711233                       | 0.0007243019622                 | WP_000216853.1 | cellular amino acid biosynthetic process [GO:0008652]; isoleucine biosynthetic process [GO:0009097]; threonine metabolic process [GO:0006566] | cellular amino acid biosynthetic process [GO:0008652]; isoleucine biosynthetic process [GO:0009097]; threonine metabolic process [GO:0006566] | L-threonine ammonia-lyase activity [GO:0004794]; pyridoxal phosphate binding [GO:0030170]; cellular amino acid biosynthetic process [GO:0008652]; isoleucine biosynthetic process [GO:0009097]; threonine metabolic process [GO:0006566]      | GO:0004794; GO:0006566; GO:0008652; GO:0009097; GO:0030170             |
| 8   | ATP phosphoribosyltransferase regulatory subunit CDS                          | -3.200985502                       | 1.41E-06                        | WP_001065590.1 | histidine biosynthetic process [GO:0000105]                                                                                                   | histidine biosynthetic process [GO:0000105]                                                                                                   | cytoplasm [GO:0005737]; histidine biosynthetic process [GO:0000105]                                                                                                                                                                           | GO:0000105; GO:0005737                                                 |
| 9   | phosphate/phosphite/phosphonate ABC transporter substrate-binding protein CDS | -3.083127957                       | 6.03E-05                        | WP_000787672.1 |                                                                                                                                               | transmembrane transport [GO:0055085]                                                                                                          | ATP-binding cassette (ABC) transporter complex [GO:0043190]; transmembrane transport [GO:0055085]                                                                                                                                             | GO:0043190; GO:0055085                                                 |
| 10  | sak CDS                                                                       | -3.026639031                       | 1.43E-12                        | WP_000919350.1 | pathogenesis [GO:0009405]; plasminogen activation [GO:0031639]                                                                                | pathogenesis [GO:0009405]; plasminogen activation [GO:0031639]                                                                                | extracellular region [GO:0005576]; pathogenesis [GO:0009405]; plasminogen activation [GO:0031639]                                                                                                                                             | GO:0005576; GO:0009405; GO:0031639                                     |
| 11  | phosphoribosylanthranilate isomerase CDS                                      | -2.968566578                       | 0.00165256602                   | WP_000768192.1 | tryptophan biosynthetic process [GO:0000162]                                                                                                  | tryptophan biosynthetic process [GO:0000162]                                                                                                  | phosphoribosylanthranilate isomerase activity [GO:0004640]; tryptophan biosynthetic process [GO:0000162]                                                                                                                                      | GO:0000162; GO:0004640                                                 |
| 12  | putative holin-like toxin CDS                                                 | -2.938401634                       | 3.54E-13                        |                |                                                                                                                                               |                                                                                                                                               |                                                                                                                                                                                                                                               |                                                                        |
| 13  | ABC transporter ATP-binding protein CDS                                       | -2.931048588                       | 2.69E-09                        | WP_001229911.1 |                                                                                                                                               |                                                                                                                                               | plasma membrane [GO:0005886]; ATP binding [GO:0005524]                                                                                                                                                                                        | GO:0005524; GO:0005886                                                 |
| 14  | type I toxin-antitoxin system Fst family toxin CDS                            | -2.912751182                       | 3.09E-07                        | WP_001791613.1 |                                                                                                                                               |                                                                                                                                               | integral component of membrane [GO:0016021]                                                                                                                                                                                                   | GO:0016021                                                             |
| 15  | putative holin-like toxin CDS                                                 | -2.908777827                       | 9.99E-12                        | WP_011447039.1 |                                                                                                                                               |                                                                                                                                               | integral component of membrane [GO:0016021]                                                                                                                                                                                                   | GO:0016021                                                             |
| 16  | ATP phosphoribosyltransferase CDS                                             | -2.866865588                       | 0.001539483174                  | WP_000944150.1 | histidine biosynthetic process [GO:0000105]                                                                                                   | histidine biosynthetic process [GO:0000105]                                                                                                   | cytoplasm [GO:0005737]; ATP binding [GO:0005524]; ATP phosphoribosyltransferase activity [GO:0003879]; histidine biosynthetic process [GO:0000105]                                                                                            | GO:0000105; GO:0003879; GO:0005524; GO:0005737                         |
| 17  | hypothetical protein CDS                                                      | -2.826285725                       | 1.74E-09                        | WP_000691527.1 |                                                                                                                                               |                                                                                                                                               |                                                                                                                                                                                                                                               |                                                                        |
| 18  | type I toxin-antitoxin system Fst family toxin CDS                            | -2.791658451                       | 6.38E-10                        | WP_000482650.1 |                                                                                                                                               |                                                                                                                                               | integral component of membrane [GO:0016021]                                                                                                                                                                                                   | GO:0016021                                                             |
| 19  | hypothetical protein CDS                                                      | -2.743611094                       | 6.76E-12                        | WP_001802298.1 |                                                                                                                                               |                                                                                                                                               | integral component of membrane [GO:0016021]                                                                                                                                                                                                   | GO:0016021                                                             |
| 20  | gallidermin/nisin family lantibiotic CDS                                      | -2.677590274                       | 0.001287630754                  | WP_000416756.1 | cytolysis [GO:0019835]; defense response to bacterium [GO:0042742]                                                                            | cytolysis [GO:0019835]; defense response to bacterium [GO:0042742]                                                                            | extracellular region [GO:0005576]; signaling receptor binding [GO:0005102]; cytolysis [GO:0019835]; defense response to bacterium [GO:0042742]                                                                                                | GO:0005102; GO:0005576; GO:0019835; GO:0042742                         |
| 21  | pepA1 CDS                                                                     | -2.676126236                       | 0.0003067409243                 | WP_001801861.1 |                                                                                                                                               |                                                                                                                                               |                                                                                                                                                                                                                                               |                                                                        |
| 22  | sasF CDS                                                                      | -2.6677212                         | 6.16E-08                        | WP_001151900.1 |                                                                                                                                               |                                                                                                                                               | cell wall [GO:0005618]; extracellular region [GO:0005576]                                                                                                                                                                                     | GO:0005576; GO:0005618                                                 |
| 23  | competence protein ComK CDS                                                   | -2.633700294                       | 3.72E-05                        | WP_000287265.1 | establishment of competence for transformation [GO:0030420]                                                                                   | establishment of competence for transformation [GO:0030420]                                                                                   | establishment of competence for transformation [GO:0030420]                                                                                                                                                                                   | GO:0030420                                                             |
| 24  | mgrA CDS                                                                      | -2.632616436                       | 1.24E-18                        | WP_001283444.1 | pathogenesis [GO:0009405]                                                                                                                     | pathogenesis [GO:0009405]                                                                                                                     | cytoplasm [GO:0005737]; DNA binding [GO:0003677]; DNA-binding transcription factor activity [GO:0003700]; pathogenesis [GO:0009405]                                                                                                           | GO:0003677; GO:0003700; GO:0005737; GO:0009405                         |
| 25  | TM2 domain-containing protein CDS                                             | -2.620009741                       | 8.14E-10                        | WP_001198024.1 |                                                                                                                                               |                                                                                                                                               | integral component of membrane [GO:0016021]                                                                                                                                                                                                   | GO:0016021                                                             |
| 26  | NupC/NupG family nucleoside CNT transporter CDS                               | -2.61005245                        | 5.10E-11                        | WP_001022961.1 |                                                                                                                                               |                                                                                                                                               | integral component of membrane [GO:0016021]; nucleoside transmembrane transporter activity [GO:0005337]                                                                                                                                       | GO:0005337; GO:0016021                                                 |
| 27  | lukG CDS                                                                      | -2.602634958                       | 1.41E-06                        | WP_000595324.1 | cytolysis in other organism [GO:0051715]; pathogenesis [GO:0009405]                                                                           | cytolysis in other organism [GO:0051715]; pathogenesis [GO:0009405]                                                                           | extracellular region [GO:0005576]; cytolysis in other organism [GO:0051715]; pathogenesis [GO:0009405]                                                                                                                                        | GO:0005576; GO:0009405; GO:0051715                                     |
| 28  | hypothetical protein CDS                                                      | -2.59128668                        | 0.0001804965816                 | WP_000499647.1 |                                                                                                                                               |                                                                                                                                               | integral component of membrane [GO:0016021]                                                                                                                                                                                                   | GO:0016021                                                             |

Supplementary Table 10. Differentially Expressed Genes (DEGs) isolated from HG4 treated sample

|    |                                                                |              |                 |                |                                                                                                   |                                                                                                   |                                                                                                                                                                                                                                                           |                                                                        |
|----|----------------------------------------------------------------|--------------|-----------------|----------------|---------------------------------------------------------------------------------------------------|---------------------------------------------------------------------------------------------------|-----------------------------------------------------------------------------------------------------------------------------------------------------------------------------------------------------------------------------------------------------------|------------------------------------------------------------------------|
| 29 | argH CDS                                                       | -2.586332026 | 1.15E-05        | WP_000066062.1 | arginine biosynthetic process via ornithine [GO:0042450]                                          | arginine biosynthetic process via ornithine [GO:0042450]                                          | cytoplasm [GO:0005737]; argininosuccinate lyase activity [GO:0004056]; arginine biosynthetic process via ornithine [GO:0042450]                                                                                                                           | GO:0004056; GO:0005737; GO:0042450                                     |
| 30 | sarR CDS                                                       | -2.574986576 | 4.92E-10        | WP_000036076.1 | pathogenesis [GO:0009405]; regulation of transcription, DNA-templated [GO:0006355]                | pathogenesis [GO:0009405]; regulation of transcription, DNA-templated [GO:0006355]                | cytoplasm [GO:0005737]; DNA binding [GO:0003677]; pathogenesis [GO:0009405]; regulation of transcription, DNA-templated [GO:0006355]                                                                                                                      | GO:0003677; GO:0005737; GO:0006355; GO:0009405                         |
| 31 | tnpA CDS                                                       | -2.566420112 | 1.74E-05        |                |                                                                                                   |                                                                                                   |                                                                                                                                                                                                                                                           |                                                                        |
| 32 | transposase CDS                                                | -2.525902981 | 0.008909283528  |                |                                                                                                   |                                                                                                   |                                                                                                                                                                                                                                                           |                                                                        |
| 33 | ABC transporter permease CDS                                   | -2.517682235 | 8.75E-05        | WP_000761395.1 |                                                                                                   |                                                                                                   | integral component of membrane [GO:0016021]; plasma membrane [GO:0005886]                                                                                                                                                                                 | GO:0005886; GO:0016021                                                 |
| 34 | replication initiation protein CDS                             | -2.510445444 | 0.003696310511  |                |                                                                                                   |                                                                                                   |                                                                                                                                                                                                                                                           |                                                                        |
| 35 | AI-2E family transporter CDS                                   | -2.505660602 | 0.0002829887154 | WP_000933105.1 |                                                                                                   |                                                                                                   | integral component of membrane [GO:0016021]                                                                                                                                                                                                               | GO:0016021                                                             |
| 36 | hypothetical protein CDS                                       | -2.502720071 | 5.81E-05        | WP_000827000.1 |                                                                                                   |                                                                                                   | plasma membrane [GO:0005886]                                                                                                                                                                                                                              | GO:0005886                                                             |
| 37 | arcC CDS                                                       | -2.45815054  | 6.83E-07        | WP_001074342.1 | arginine metabolic process [GO:0006525]; carbamoyl phosphate catabolic process [GO:0035975]       | arginine metabolic process [GO:0006525]; carbamoyl phosphate catabolic process [GO:0035975]       | cytoplasm [GO:0005737]; ATP binding [GO:0005524]; carbamate kinase activity [GO:0008804]; arginine metabolic process [GO:0006525]; carbamoyl phosphate catabolic process [GO:0035975]                                                                     | GO:0005524; GO:0005737; GO:0006525; GO:0008804; GO:0035975             |
| 38 | hypothetical protein CDS                                       | -2.441636517 | 4.60E-08        | WP_000991705.1 |                                                                                                   |                                                                                                   |                                                                                                                                                                                                                                                           |                                                                        |
| 39 | uhpT CDS                                                       | -2.409652169 | 4.00E-07        | WP_001008722.1 |                                                                                                   |                                                                                                   | integral component of membrane [GO:0016021]; plasma membrane [GO:0005886]; transmembrane transporter activity [GO:0022857]                                                                                                                                | GO:0005886; GO:0016021; GO:0022857                                     |
| 40 | ruvX CDS                                                       | -2.401625335 | 3.31E-13        | WP_000939059.1 | rRNA 5'-end processing [GO:0000967]                                                               | rRNA 5'-end processing [GO:0000967]                                                               | cytoplasm [GO:0005737]; nuclease activity [GO:0004518]; rRNA 5'-end processing [GO:0000967]                                                                                                                                                               | GO:0000967; GO:0004518; GO:0005737                                     |
| 41 | hypothetical protein CDS                                       | -2.390525989 | 2.70E-07        | WP_000735558.1 |                                                                                                   |                                                                                                   |                                                                                                                                                                                                                                                           |                                                                        |
| 42 | SarA family transcriptional regulator CDS                      | -2.384171227 | 8.81E-08        | WP_000032855.1 | regulation of transcription, DNA-templated [GO:0006355]                                           | regulation of transcription, DNA-templated [GO:0006355]                                           | regulation of transcription, DNA-templated [GO:0006355]                                                                                                                                                                                                   | GO:0006355                                                             |
| 43 | DUF961 family protein CDS                                      | -2.381753003 | 0.004426857839  | WP_000805733.1 |                                                                                                   |                                                                                                   |                                                                                                                                                                                                                                                           |                                                                        |
| 44 | hypothetical protein CDS                                       | -2.381480195 | 3.30E-08        | WP_000031108.1 |                                                                                                   |                                                                                                   |                                                                                                                                                                                                                                                           |                                                                        |
| 45 | hypothetical protein CDS                                       | -2.361224037 | 4.11E-05        | WP_001789984.1 |                                                                                                   |                                                                                                   | integral component of membrane [GO:0016021]                                                                                                                                                                                                               | GO:0016021                                                             |
| 46 | argininosuccinate synthase CDS                                 | -2.353314959 | 2.90E-05        | WP_000660045.1 | arginine biosynthetic process [GO:0006526]                                                        | arginine biosynthetic process [GO:0006526]                                                        | cytoplasm [GO:0005737]; argininosuccinate synthase activity [GO:0004055]; ATP binding [GO:0005524]; arginine biosynthetic process [GO:0006526]                                                                                                            | GO:0004055; GO:0005524; GO:0005737; GO:0006526                         |
| 47 | raiA CDS                                                       | -2.344393429 | 1.37E-07        | WP_000617735.1 | primary metabolic process [GO:0044238]; regulation of translation [GO:0006417]                    | primary metabolic process [GO:0044238]; regulation of translation [GO:0006417]                    | cytoplasm [GO:0005737]; primary metabolic process [GO:0044238]; regulation of translation [GO:0006417]                                                                                                                                                    | GO:0005737; GO:0006417; GO:0044238                                     |
| 48 | Y-family DNA polymerase CDS                                    | -2.338922278 | 8.47E-06        | WP_000283016.1 | DNA repair [GO:0006281]                                                                           | DNA repair [GO:0006281]                                                                           | damaged DNA binding [GO:0003684]; DNA repair [GO:0006281]                                                                                                                                                                                                 | GO:0003684; GO:0006281                                                 |
| 49 | ABC-2 transporter permease CDS                                 | -2.338845541 | 0.01363448676   | WP_000677714.1 |                                                                                                   |                                                                                                   | integral component of membrane [GO:0016021]                                                                                                                                                                                                               | GO:0016021                                                             |
| 50 | hypothetical protein CDS                                       | -2.306626719 | 0.0005018130123 | WP_001788321.1 |                                                                                                   |                                                                                                   |                                                                                                                                                                                                                                                           |                                                                        |
| 51 | PH domain-containing protein CDS                               | -2.291674093 | 1.29E-11        | WP_000599587.1 |                                                                                                   |                                                                                                   |                                                                                                                                                                                                                                                           |                                                                        |
| 52 | hypothetical protein CDS                                       | -2.28502047  | 0.01922177786   | WP_000431307.1 |                                                                                                   |                                                                                                   | integral component of membrane [GO:0016021]                                                                                                                                                                                                               | GO:0016021                                                             |
| 53 | histidinol dehydrogenase CDS                                   | -2.27652191  | 0.004117944595  | WP_000930643.1 | histidine biosynthetic process [GO:0000105]                                                       | histidine biosynthetic process [GO:0000105]                                                       | histidinol dehydrogenase activity [GO:0004399]; NAD binding [GO:0051287]; zinc ion binding [GO:0008270]; histidine biosynthetic process [GO:0000105]                                                                                                      | GO:0000105; GO:0004399; GO:0008270; GO:0051287                         |
| 54 | lantibiotic protection ABC transporter ATP-binding subunit CDS | -2.27513227  | 6.43E-05        | WP_001096791.1 |                                                                                                   |                                                                                                   | ATP binding [GO:0005524]; ATPase-coupled transmembrane transporter activity [GO:0042626]; hydrolase activity [GO:0016787]                                                                                                                                 | GO:0005524; GO:0016787; GO:0042626                                     |
| 55 | hypothetical protein CDS                                       | -2.245011373 | 1.65E-09        | WP_000801007.1 |                                                                                                   |                                                                                                   |                                                                                                                                                                                                                                                           |                                                                        |
| 56 | phosphatidylinositol-specific phospholipase C CDS              | -2.229518949 | 0.02065012141   | WP_000710576.1 | lipid catabolic process [GO:0016042]; pathogenesis [GO:0009405]; signal transduction [GO:0007165] | lipid catabolic process [GO:0016042]; pathogenesis [GO:0009405]; signal transduction [GO:0007165] | extracellular region [GO:0005576]; phosphatidylinositol diacylglycerol-lyase activity [GO:0004436]; phosphoric diester hydrolase activity [GO:0008081]; lipid catabolic process [GO:0016042]; pathogenesis [GO:0009405]; signal transduction [GO:0007165] | GO:0004436; GO:0005576; GO:0007165; GO:0008081; GO:0009405; GO:0016042 |
| 57 | hypothetical protein CDS                                       | -2.183541019 | 0.0005648907511 | WP_001791821.1 |                                                                                                   |                                                                                                   |                                                                                                                                                                                                                                                           |                                                                        |
| 58 | pseudouridine-5'-phosphate glycosidase CDS                     | -2.180076641 | 8.63E-08        | WP_000002068.1 | nucleobase catabolic process [GO:0046113]                                                         | nucleobase catabolic process [GO:0046113]                                                         | hydrolase activity, acting on glycosyl bonds [GO:0016798]; metal ion binding [GO:0046872]; pseudouridylate synthase activity [GO:0004730]; nucleobase catabolic process [GO:0046113]                                                                      | GO:0004730; GO:0016798; GO:0046113; GO:0046872                         |

Supplementary Table 10. Differentially Expressed Genes (DEGs) isolated from HG4 treated sample

|    |                                                              |              |                 |                |                                                                                                                                                       |                                                                                                                                                       |                                                                                                                                                                                                                                                                              |                                                                                    |
|----|--------------------------------------------------------------|--------------|-----------------|----------------|-------------------------------------------------------------------------------------------------------------------------------------------------------|-------------------------------------------------------------------------------------------------------------------------------------------------------|------------------------------------------------------------------------------------------------------------------------------------------------------------------------------------------------------------------------------------------------------------------------------|------------------------------------------------------------------------------------|
| 59 | glucosamine-6-phosphate isomerase CDS                        | -2.169047337 | 5.73E-06        | WP_001251224.1 | N-acetylglucosamine metabolic process [GO:0006044]                                                                                                    | N-acetylglucosamine metabolic process [GO:0006044]                                                                                                    | glucosamine-6-phosphate deaminase activity [GO:0004342]; N-acetylglucosamine metabolic process [GO:0006044]                                                                                                                                                                  | GO:0004342; GO:0006044                                                             |
| 60 | sarA CDS                                                     | -2.166457168 | 6.87E-11        | WP_001018677.1 | pathogenesis [GO:0009405]; regulation of transcription, DNA-templated [GO:0006355]                                                                    | pathogenesis [GO:0009405]; regulation of transcription, DNA-templated [GO:0006355]                                                                    | cytoplasm [GO:0005737]; DNA binding [GO:0003677]; metal ion binding [GO:0046872]; pathogenesis [GO:0009405]; regulation of transcription, DNA-templated [GO:0006355]                                                                                                         | GO:0003677; GO:0005737; GO:0006355; GO:0009405; GO:0046872                         |
| 61 | agrB CDS                                                     | -2.143560741 | 5.34E-06        | WP_001105707.1 | pathogenesis [GO:0009405]; quorum sensing [GO:0009372]                                                                                                | pathogenesis [GO:0009405]; quorum sensing [GO:0009372]                                                                                                | integral component of membrane [GO:0016021]; plasma membrane [GO:0005886]; peptidase activity [GO:0008233]; pathogenesis [GO:0009405]; quorum sensing [GO:0009372]                                                                                                           | GO:0005886; GO:0008233; GO:0009372; GO:0009405; GO:0016021                         |
| 62 | graF CDS                                                     | -2.116551407 | 0.0006889745272 | WP_000064214.1 |                                                                                                                                                       |                                                                                                                                                       |                                                                                                                                                                                                                                                                              |                                                                                    |
| 63 | serS CDS                                                     | -2.108810827 | 5.55E-08        | WP_000884334.1 | selenocysteine biosynthetic process [GO:0016260]; selenocysteinyl-tRNA(Sec) biosynthetic process [GO:0097056]; seryl-tRNA aminoacylation [GO:0006434] | selenocysteine biosynthetic process [GO:0016260]; selenocysteinyl-tRNA(Sec) biosynthetic process [GO:0097056]; seryl-tRNA aminoacylation [GO:0006434] | cytoplasm [GO:0005737]; ATP binding [GO:0005524]; serine-tRNA ligase activity [GO:0004828]; selenocysteine biosynthetic process [GO:0016260]; selenocysteinyl-tRNA(Sec) biosynthetic process [GO:0097056]; seryl-tRNA aminoacylation [GO:0006434]                            | GO:0004828; GO:0005524; GO:0005737; GO:0006434; GO:0016260; GO:0097056             |
| 64 | cyclic lactone autoinducer peptide CDS                       | -2.104876598 | 7.32E-06        | WP_001093929.1 |                                                                                                                                                       |                                                                                                                                                       |                                                                                                                                                                                                                                                                              |                                                                                    |
| 65 | adhP CDS                                                     | -2.100255645 | 2.54E-12        | WP_001200748.1 |                                                                                                                                                       |                                                                                                                                                       | alcohol dehydrogenase (NAD+) activity [GO:0004022]; zinc ion binding [GO:0008270]                                                                                                                                                                                            | GO:0004022; GO:0008270                                                             |
| 66 | S8 family serine peptidase CDS                               | -2.093774316 | 0.0007617405055 | WP_000691541.1 |                                                                                                                                                       |                                                                                                                                                       | serine-type endopeptidase activity [GO:0004252]                                                                                                                                                                                                                              | GO:0004252                                                                         |
| 67 | ABC transporter permease CDS                                 | -2.061586921 | 0.001147296609  | WP_000569120.1 | nickel cation transport [GO:0015675]; transmembrane transport [GO:0055085]                                                                            | nickel cation transport [GO:0015675]; transmembrane transport [GO:0055085]                                                                            | integral component of membrane [GO:0016021]; plasma membrane [GO:0005886]; nickel cation transport [GO:0015675]; transmembrane transport [GO:0055085]                                                                                                                        | GO:0005886; GO:0015675; GO:0016021; GO:0055085                                     |
| 68 | hypothetical protein CDS                                     | -2.060439022 | 7.24E-06        | WP_000193917.1 |                                                                                                                                                       |                                                                                                                                                       | integral component of membrane [GO:0016021]                                                                                                                                                                                                                                  | GO:0016021                                                                         |
| 69 | ABC transporter permease CDS                                 | -2.058629482 | 4.41E-09        | WP_000536961.1 |                                                                                                                                                       |                                                                                                                                                       | integral component of membrane [GO:0016021]; ATP binding [GO:0005524]                                                                                                                                                                                                        | GO:0005524; GO:0016021                                                             |
| 70 | mecA CDS                                                     | -2.056163287 | 3.70E-11        | WP_001217730.1 |                                                                                                                                                       |                                                                                                                                                       | protein-macromolecule adaptor activity [GO:0030674]                                                                                                                                                                                                                          | GO:0030674                                                                         |
| 71 | lukH CDS                                                     | -2.044574218 | 0.003290643513  | WP_000791407.1 | cytolysis in other organism [GO:0051715]; pathogenesis [GO:0009405]                                                                                   | cytolysis in other organism [GO:0051715]; pathogenesis [GO:0009405]                                                                                   | extracellular region [GO:0005576]; cytolysis in other organism [GO:0051715]; pathogenesis [GO:0009405]                                                                                                                                                                       | GO:0005576; GO:0009405; GO:0051715                                                 |
| 72 | ABC transporter permease CDS                                 | -2.024168106 | 8.17E-06        | WP_000398941.1 | nickel cation transport [GO:0015675]; transmembrane transport [GO:0055085]                                                                            | nickel cation transport [GO:0015675]; transmembrane transport [GO:0055085]                                                                            | integral component of membrane [GO:0016021]; plasma membrane [GO:0005886]; nickel cation transport [GO:0015675]; transmembrane transport [GO:0055085]                                                                                                                        | GO:0005886; GO:0015675; GO:0016021; GO:0055085                                     |
| 73 | MerR family transcriptional regulator CDS                    | -2.023803688 | 0.02699973889   | WP_000850012.1 | regulation of transcription, DNA-templated [GO:0006355]                                                                                               | regulation of transcription, DNA-templated [GO:0006355]                                                                                               | DNA binding [GO:0003677]; regulation of transcription, DNA-templated [GO:0006355]                                                                                                                                                                                            | GO:0003677; GO:0006355                                                             |
| 74 | qoxD CDS                                                     | -2.023044285 | 3.07E-08        | WP_001797236.1 | ATP synthesis coupled electron transport [GO:0042773]                                                                                                 | ATP synthesis coupled electron transport [GO:0042773]                                                                                                 | integral component of membrane [GO:0016021]; plasma membrane [GO:0005886]; oxidoreductase activity, acting on diphenols and related substances as donors, oxygen as acceptor [GO:0016682]; ATP synthesis coupled electron transport [GO:0042773]                             | GO:0005886; GO:0016021; GO:0016682; GO:0042773                                     |
| 75 | cap8F CDS                                                    | -2.007558487 | 0.04059714434   | WP_001028293.1 |                                                                                                                                                       |                                                                                                                                                       | catalytic activity [GO:0003824]                                                                                                                                                                                                                                              | GO:0003824                                                                         |
| 76 | PTS glucose transporter subunit IIA CDS                      | -2.000161573 | 2.85E-11        | WP_000473652.1 | phosphoenolpyruvate-dependent sugar phosphotransferase system [GO:0009401]                                                                            | phosphoenolpyruvate-dependent sugar phosphotransferase system [GO:0009401]                                                                            | cytoplasm [GO:0005737]; kinase activity [GO:0016301]; metal ion binding [GO:0046872]; phosphoenolpyruvate-dependent sugar phosphotransferase system [GO:0009401]                                                                                                             | GO:0005737; GO:0009401; GO:0016301; GO:0046872                                     |
| 77 | DUF5079 family protein CDS                                   | 2.015974001  | 0.03985739591   | WP_000208414.1 |                                                                                                                                                       |                                                                                                                                                       | integral component of membrane [GO:0016021]                                                                                                                                                                                                                                  | GO:0016021                                                                         |
| 78 | phosphate ABC transporter substrate-binding protein PstS CDS | 2.027093121  | 0.0388002751    | WP_000759232.1 | phosphate ion transport [GO:0006817]                                                                                                                  | phosphate ion transport [GO:0006817]                                                                                                                  | plasma membrane [GO:0005886]; phosphate ion binding [GO:0042301]; phosphate ion transport [GO:0006817]                                                                                                                                                                       | GO:0005886; GO:0006817; GO:0042301                                                 |
| 79 | sdpB CDS                                                     | 2.042149721  | 0.01953242817   | WP_000426696.1 | CAAX-box protein processing [GO:0071586]                                                                                                              | CAAX-box protein processing [GO:0071586]                                                                                                              | integral component of membrane [GO:0016021]; metalloendopeptidase activity [GO:0004222]; CAAX-box protein processing [GO:0071586]                                                                                                                                            | GO:0004222; GO:0016021; GO:0071586                                                 |
| 80 | GNAT family N-acetyltransferase CDS                          | 2.047190159  | 0.0208497551    | WP_000620953.1 |                                                                                                                                                       |                                                                                                                                                       | N-acetyltransferase activity [GO:0008080]                                                                                                                                                                                                                                    | GO:0008080                                                                         |
| 81 | hypothetical protein CDS                                     | 2.051976683  | 0.006912650185  | WP_000414205.1 |                                                                                                                                                       |                                                                                                                                                       |                                                                                                                                                                                                                                                                              |                                                                                    |
| 82 | typA CDS                                                     | 2.124746689  | 8.86E-08        | WP_000182654.1 | ribosomal large subunit assembly [GO:0000027]                                                                                                         | ribosomal large subunit assembly [GO:0000027]                                                                                                         | cytoplasm [GO:0005737]; GTP binding [GO:0005525]; GTPase activity [GO:0003924]; ribosome binding [GO:0043022]; rRNA binding [GO:0019843]; tRNA binding [GO:0000049]; ribosomal large subunit assembly [GO:0000027]                                                           | GO:0000027; GO:0000049; GO:0003924; GO:0005525; GO:0005737; GO:0019843; GO:0043022 |
| 83 | purK CDS                                                     | 2.142987263  | 0.0008010238944 | WP_001010412.1 | 'de novo' IMP biosynthetic process [GO:0006189]                                                                                                       | 'de novo' IMP biosynthetic process [GO:0006189]                                                                                                       | 5-(carboxyamino)imidazole ribonucleotide synthase activity [GO:0034028]; ATP binding [GO:0005524]; metal ion binding [GO:0046872]; NAD binding [GO:0051287]; phosphoribosylaminoimidazole carboxylase activity [GO:0004638]; 'de novo' IMP biosynthetic process [GO:0006189] | GO:0004638; GO:0005524; GO:0006189; GO:0034028; GO:0046872; GO:0051287             |

Supplementary Table 10. Differentially Expressed Genes (DEGs) isolated from HG4 treated sample

|     |                                                                 |             |                 |                |                                                                                                                               |                                                                                                                               |                                                                                                                                                                                                                                                                           |                                                                                                |
|-----|-----------------------------------------------------------------|-------------|-----------------|----------------|-------------------------------------------------------------------------------------------------------------------------------|-------------------------------------------------------------------------------------------------------------------------------|---------------------------------------------------------------------------------------------------------------------------------------------------------------------------------------------------------------------------------------------------------------------------|------------------------------------------------------------------------------------------------|
| 84  | HAD family hydrolase CDS                                        | 2.167140209 | 0.0181436129    | WP_000667097.1 |                                                                                                                               |                                                                                                                               | phosphoglycolate phosphatase activity [GO:0008967]                                                                                                                                                                                                                        | GO:0008967                                                                                     |
| 85  | nreB CDS                                                        | 2.176189733 | 1.31E-11        | WP_000606546.1 |                                                                                                                               |                                                                                                                               | cytoplasm [GO:0005737]; integral component of membrane [GO:0016021]; 4 iron, 4 sulfur cluster binding [GO:0051539]; ATP binding [GO:0005524]; iron ion binding [GO:0005506]; phosphorelay sensor kinase activity [GO:0000155]; protein dimerization activity [GO:0046983] | GO:0000155; GO:0005506; GO:0005524; GO:0005737; GO:0016021; GO:0046983; GO:0051539             |
| 86  | CHAP domain-containing protein CDS                              | 2.179781492 | 0.02583834357   | WP_000247465.1 |                                                                                                                               |                                                                                                                               | extracellular region [GO:0005576]; integral component of membrane [GO:0016021]; amidase activity [GO:0004040]                                                                                                                                                             | GO:0004040; GO:0005576; GO:0016021                                                             |
| 87  | DUF3169 family protein CDS                                      | 2.191384176 | 1.07E-07        | WP_000698752.1 |                                                                                                                               |                                                                                                                               | integral component of membrane [GO:0016021]; plasma membrane [GO:0005886]                                                                                                                                                                                                 | GO:0005886; GO:0016021                                                                         |
| 88  | nreC CDS                                                        | 2.198075114 | 4.51E-12        | WP_000706315.1 | phosphorelay signal transduction system [GO:0000160]; regulation of transcription, DNA-templated [GO:0006355]                 | phosphorelay signal transduction system [GO:0000160]; regulation of transcription, DNA-templated [GO:0006355]                 | cytoplasm [GO:0005737]; DNA binding [GO:0003677]; phosphorelay signal transduction system [GO:0000160]; regulation of transcription, DNA-templated [GO:0006355]                                                                                                           | GO:0000160; GO:0003677; GO:0005737; GO:0006355                                                 |
| 89  | serine hydrolase family protein CDS                             | 2.201545199 | 0.001583956496  | WP_000132890.1 |                                                                                                                               |                                                                                                                               | hydrolase activity [GO:0016787]                                                                                                                                                                                                                                           | GO:0016787                                                                                     |
| 90  | scb CDS                                                         | 2.20332759  | 7.44E-07        | WP_000669537.1 |                                                                                                                               |                                                                                                                               | extracellular region [GO:0005576]                                                                                                                                                                                                                                         | GO:0005576                                                                                     |
| 91  | DUF1398 family protein CDS                                      | 2.209809987 | 0.004793119298  | WP_000886005.1 |                                                                                                                               |                                                                                                                               |                                                                                                                                                                                                                                                                           |                                                                                                |
| 92  | isoprenylcysteine carboxyl methyltransferase family protein CDS | 2.218468281 | 0.004601695576  | WP_000603755.1 |                                                                                                                               |                                                                                                                               | integral component of membrane [GO:0016021]; protein C-terminal S-isoprenylcysteine carboxyl O-methyltransferase activity [GO:0004671]                                                                                                                                    | GO:0004671; GO:0016021                                                                         |
| 93  | hypothetical protein CDS                                        | 2.23449313  | 0.02214341541   | WP_001790169.1 |                                                                                                                               |                                                                                                                               | integral component of membrane [GO:0016021]                                                                                                                                                                                                                               | GO:0016021                                                                                     |
| 94  | gatC CDS                                                        | 2.277844105 | 0.0004266925159 | WP_000170162.1 | regulation of translational fidelity [GO:0006450]; translation [GO:0006412]                                                   | regulation of translational fidelity [GO:0006450]; translation [GO:0006412]                                                   | asparaginyl-tRNA synthase (glutamine-hydrolyzing) activity [GO:0050566]; ATP binding [GO:0005524]; glutaminyl-tRNA synthase (glutamine-hydrolyzing) activity [GO:0050567]; regulation of translational fidelity [GO:0006450]; translation [GO:0006412]                    | GO:0005524; GO:0006412; GO:0006450; GO:0050566; GO:0050567                                     |
| 95  | tRNA1(Val) (adenine(37)-N6)-methyltransferase CDS               | 2.285901889 | 0.01277087653   | WP_000910689.1 |                                                                                                                               |                                                                                                                               | methyltransferase activity [GO:0008168]                                                                                                                                                                                                                                   | GO:0008168                                                                                     |
| 96  | helix-turn-helix transcriptional regulator CDS                  | 2.292071389 | 0.008159497935  | WP_000429766.1 |                                                                                                                               |                                                                                                                               | DNA binding [GO:0003677]                                                                                                                                                                                                                                                  | GO:0003677                                                                                     |
| 97  | PrsW family intramembrane metalloprotease CDS                   | 2.309361475 | 0.0008379221639 | WP_001789851.1 |                                                                                                                               |                                                                                                                               | integral component of membrane [GO:0016021]; peptidase activity [GO:0008233]                                                                                                                                                                                              | GO:0008233; GO:0016021                                                                         |
| 98  | hypothetical protein CDS                                        | 2.319210526 | 8.18E-07        | WP_001251935.1 |                                                                                                                               |                                                                                                                               |                                                                                                                                                                                                                                                                           |                                                                                                |
| 99  | sdrC CDS                                                        | 2.36134001  | 0.01328147768   | WP_001060483.1 | cell adhesion [GO:0007155]                                                                                                    | cell adhesion [GO:0007155]                                                                                                    | cell wall [GO:0005618]; extracellular region [GO:0005576]; cell adhesion [GO:0007155]                                                                                                                                                                                     | GO:0005576; GO:0005618; GO:0007155                                                             |
| 100 | rhodanese-like domain-containing protein CDS                    | 2.370158836 | 1.28E-05        | WP_001276571.1 |                                                                                                                               |                                                                                                                               | integral component of membrane [GO:0016021]                                                                                                                                                                                                                               | GO:0016021                                                                                     |
| 101 | GntR family transcriptional regulator CDS                       | 2.385762344 | 0.003815964276  | WP_000990133.1 |                                                                                                                               |                                                                                                                               | DNA binding [GO:0003677]; DNA-binding transcription factor activity [GO:0003700]; transaminase activity [GO:0008483]                                                                                                                                                      | GO:0003677; GO:0003700; GO:0008483                                                             |
| 102 | protein-serine/threonine phosphatase Stp1 CDS                   | 2.388954081 | 0.002320903601  | WP_000888494.1 |                                                                                                                               |                                                                                                                               | protein serine phosphatase activity [GO:0106306]; protein threonine phosphatase activity [GO:0106307]                                                                                                                                                                     | GO:0106306; GO:0106307                                                                         |
| 103 | ribonuclease III CDS                                            | 2.431330393 | 0.0003452988949 | WP_000043237.1 | mRNA processing [GO:0006397]; rRNA catabolic process [GO:0016075]; rRNA processing [GO:0006364]; tRNA processing [GO:0008033] | mRNA processing [GO:0006397]; rRNA catabolic process [GO:0016075]; rRNA processing [GO:0006364]; tRNA processing [GO:0008033] | cytoplasm [GO:0005737]; metal ion binding [GO:0046872]; ribonuclease III activity [GO:0004525]; rRNA binding [GO:0019843]; mRNA processing [GO:0006397]; rRNA catabolic process [GO:0016075]; rRNA processing [GO:0006364]; tRNA processing [GO:0008033]                  | GO:0004525; GO:0005737; GO:0006364; GO:0006397; GO:0008033; GO:0016075; GO:0019843; GO:0046872 |
| 104 | tatC CDS                                                        | 2.436923007 | 0.002386765691  | WP_001795631.1 | protein transport by the Tat complex [GO:0043953]                                                                             | protein transport by the Tat complex [GO:0043953]                                                                             | integral component of plasma membrane [GO:0005887]; TAT protein transport complex [GO:0033281]; protein transmembrane transporter activity [GO:0008320]; protein transport by the Tat complex [GO:0043953]                                                                | GO:0005887; GO:0008320; GO:0033281; GO:0043953                                                 |
| 105 | tRNA threonylcarbamoyladenosine dehydratase CDS                 | 2.439279232 | 4.20E-07        | WP_000682646.1 |                                                                                                                               |                                                                                                                               | ubiquitin-like modifier activating enzyme activity [GO:0008641]                                                                                                                                                                                                           | GO:0008641                                                                                     |
| 106 | superantigen-like protein SSL11 CDS                             | 2.449426345 | 0.006482517158  | WP_000769163.1 | pathogenesis [GO:0009405]                                                                                                     | pathogenesis [GO:0009405]                                                                                                     | extracellular region [GO:0005576]; pathogenesis [GO:0009405]                                                                                                                                                                                                              | GO:0005576; GO:0009405                                                                         |
| 107 | recX CDS                                                        | 2.46904785  | 0.0004190525296 | WP_001124419.1 | regulation of DNA repair [GO:0006282]                                                                                         | regulation of DNA repair [GO:0006282]                                                                                         | cytoplasm [GO:0005737]; regulation of DNA repair [GO:0006282]                                                                                                                                                                                                             | GO:0005737; GO:0006282                                                                         |
| 108 | penicillin-binding protein CDS                                  | 2.475568729 | 0.002734099117  | WP_000184370.1 |                                                                                                                               |                                                                                                                               | integral component of membrane [GO:0016021]                                                                                                                                                                                                                               | GO:0016021                                                                                     |
| 109 | thymidine kinase CDS                                            | 2.493362302 | 4.27E-05        | WP_000273356.1 | DNA biosynthetic process [GO:0071897]                                                                                         | DNA biosynthetic process [GO:0071897]                                                                                         | cytoplasm [GO:0005737]; ATP binding [GO:0005524]; thymidine kinase activity [GO:0004797]; zinc ion binding [GO:0008270]; DNA biosynthetic process [GO:0071897]                                                                                                            | GO:0004797; GO:0005524; GO:0005737; GO:0008270; GO:0071897                                     |

Supplementary Table 10. Differentially Expressed Genes (DEGs) isolated from HG4 treated sample

|     |                                                               |             |                 |                |                                                                                                                                     |                                                                                                                                     |                                                                                                                                                                                                                   |                                                            |
|-----|---------------------------------------------------------------|-------------|-----------------|----------------|-------------------------------------------------------------------------------------------------------------------------------------|-------------------------------------------------------------------------------------------------------------------------------------|-------------------------------------------------------------------------------------------------------------------------------------------------------------------------------------------------------------------|------------------------------------------------------------|
| 110 | efb CDS                                                       | 2.539718971 | 3.60E-10        | WP_000791587.1 | pathogenesis [GO:0009405]                                                                                                           | pathogenesis [GO:0009405]                                                                                                           | extracellular space [GO:0005615]; complement binding [GO:0001848]; pathogenesis [GO:0009405]                                                                                                                      | GO:0001848; GO:0005615; GO:0009405                         |
| 111 | hypothetical protein CDS                                      | 2.554894233 | 0.008206586427  | WP_000678764.1 |                                                                                                                                     |                                                                                                                                     | integral component of membrane [GO:0016021]                                                                                                                                                                       | GO:0016021                                                 |
| 112 | SH3 domain-containing protein CDS                             | 2.573913241 | 2.19E-06        |                |                                                                                                                                     |                                                                                                                                     |                                                                                                                                                                                                                   |                                                            |
| 113 | pmtA CDS                                                      | 2.581059061 | 1.62E-08        | WP_000991302.1 |                                                                                                                                     |                                                                                                                                     | ATP binding [GO:0005524]; hydrolase activity [GO:0016787]                                                                                                                                                         | GO:0005524; GO:0016787                                     |
| 114 | BglG family transcription antiterminator CDS                  | 2.602911254 | 6.23E-05        | WP_000954261.1 | phosphoenolpyruvate-dependent sugar phosphotransferase system [GO:0009401]; regulation of transcription, DNA-templated [GO:0006355] | phosphoenolpyruvate-dependent sugar phosphotransferase system [GO:0009401]; regulation of transcription, DNA-templated [GO:0006355] | protein-N(P)-phosphohistidine-sugar phosphotransferase activity [GO:0008982]; phosphoenolpyruvate-dependent sugar phosphotransferase system [GO:0009401]; regulation of transcription, DNA-templated [GO:0006355] | GO:0006355; GO:0008982; GO:0009401                         |
| 115 | vraD CDS                                                      | 2.691153034 | 0.00507866329   | WP_000154162.1 |                                                                                                                                     |                                                                                                                                     | ATP binding [GO:0005524]                                                                                                                                                                                          | GO:0005524                                                 |
| 116 | brnQ CDS                                                      | 2.728120892 | 0.0008686188876 | WP_001039275.1 |                                                                                                                                     |                                                                                                                                     | integral component of membrane [GO:0016021]; plasma membrane [GO:0005886]; branched-chain amino acid transmembrane transporter activity [GO:0015658]                                                              | GO:0005886; GO:0015658; GO:0016021                         |
| 117 | threonine/serine exporter family protein CDS                  | 2.774399982 | 0.003813860213  | WP_000498572.1 |                                                                                                                                     |                                                                                                                                     | integral component of membrane [GO:0016021]                                                                                                                                                                       | GO:0016021                                                 |
| 118 | teichoic acid D-Ala incorporation-associated protein DltX CDS | 2.823125899 | 5.90E-05        | WP_000837752.1 |                                                                                                                                     |                                                                                                                                     | integral component of membrane [GO:0016021]                                                                                                                                                                       | GO:0016021                                                 |
| 119 | LLM class flavin-dependent oxidoreductase CDS                 | 2.836091081 | 0.002957806242  | WP_000240058.1 |                                                                                                                                     |                                                                                                                                     | (R)-limonene 1,2-monooxygenase NADH activity [GO:0106319]; (R)-limonene 1,2-monooxygenase NADPH activity [GO:0106320]; (S)-limonene 1,2-monooxygenase activity [GO:0052601]                                       | GO:0052601; GO:0106319; GO:0106320                         |
| 120 | coa CDS                                                       | 2.870667971 | 8.17E-09        | WP_000744073.1 |                                                                                                                                     |                                                                                                                                     |                                                                                                                                                                                                                   |                                                            |
| 121 | rsmA CDS                                                      | 2.953205492 | 0.0001852488753 | WP_000886500.1 |                                                                                                                                     |                                                                                                                                     | cytoplasm [GO:0005737]; 16S rRNA (adenine(1518)-N(6)/adenine(1519)-N(6))-dimethyltransferase activity [GO:0052908]; RNA binding [GO:0003723]                                                                      | GO:0003723; GO:0005737; GO:0052908                         |
| 122 | GntR family transcriptional regulator CDS                     | 3.443297153 | 1.81E-07        | WP_000922329.1 |                                                                                                                                     |                                                                                                                                     | DNA binding [GO:0003677]; DNA-binding transcription factor activity [GO:0003700]; transaminase activity [GO:0008483]                                                                                              | GO:0003677; GO:0003700; GO:0008483                         |
| 123 | ribonuclease HIII CDS                                         | 3.560207505 | 9.94E-05        | WP_001284258.1 | RNA catabolic process [GO:0006401]                                                                                                  | RNA catabolic process [GO:0006401]                                                                                                  | cytoplasm [GO:0005737]; magnesium ion binding [GO:0000287]; RNA binding [GO:0003723]; RNA-DNA hybrid ribonuclease activity [GO:0004523]; RNA catabolic process [GO:0006401]                                       | GO:0000287; GO:0003723; GO:0004523; GO:0005737; GO:0006401 |

**Supplementary Table 11. Frequencies of Top 10 statistically significant Gene Ontology (GO) ID and description in the Differentially expressed genes (DEGs) in the HG4 treatment group**

| <b>GO ID</b>      | <b>Count</b> | <b>Percentage Occurrence in DEGs</b> | <b>Term Descriptions</b>                   |
|-------------------|--------------|--------------------------------------|--------------------------------------------|
| <b>GO:0016021</b> | 30           | 11%                                  | integral component of membrane             |
| <b>GO:0005737</b> | 19           | 7%                                   | cytoplasm                                  |
| <b>GO:0005524</b> | 14           | 5%                                   | ATP binding                                |
| <b>GO:0005576</b> | 10           | 4%                                   | extracellular region                       |
| <b>GO:0005886</b> | 10           | 4%                                   | plasma membrane                            |
| <b>GO:0009405</b> | 10           | 4%                                   | pathogenesis                               |
| <b>GO:0003677</b> | 7            | 3%                                   | DNA binding                                |
| <b>GO:0006355</b> | 6            | 2%                                   | regulation of transcription, DNA-templated |
| <b>GO:0046872</b> | 4            | 1%                                   | metal ion binding                          |
| <b>GO:0008270</b> | 3            | 1%                                   | zinc ion binding                           |
